# Supplementary material for: Facile modular synthesis of jasmonoyl-l-isoleucine analogs possessing a pyrazolidin-3-one core
Source: Royal Society of Chemistry journal article supplement (doi:10.1039/d3ra07887f), 2024-01-01

# Facile Modular Synthesis of Jasmonoyl-L-Isoleucine Analogues Possessing a Pyrazolidin-3-one Core

Samuel Vizcaíno Páez,<sup>a</sup> Diego Durango Restrepo,<sup>b</sup> Christian Jürgen Müller,<sup>c</sup> Matthias Breuning<sup>c\*</sup> and Wiston Quiñones Fletcher<sup>a\*</sup>

<sup>a</sup> Química orgánica de productos naturales, Universidad de Antioquia, Medellín, 050010, Antioquia, Colombia

<sup>b</sup> Química de productos naturales y los alimentos, Universidad Nacional de Colombia, Medellín, 050034, Antioquia, Colombia

<sup>c</sup> Department of Chemistry, University of Bayreuth, Universitätsstraße 30, 95447 Bayreuth, Germany

## NMR spectra

The spectra are given in the same order as in the experiments described in the main text. All signal assignments in the <sup>1</sup>H and <sup>13</sup>C NMR data were made on basis of 2D NMR spectra (COSY, HSQC, HMBC).

$^1\text{H}$  NMR (500 MHz,  $\text{CDCl}_3$ ) and  $^{13}\text{C}$  Jmod NMR (125 MHz,  $\text{CDCl}_3$ ) of **4**:

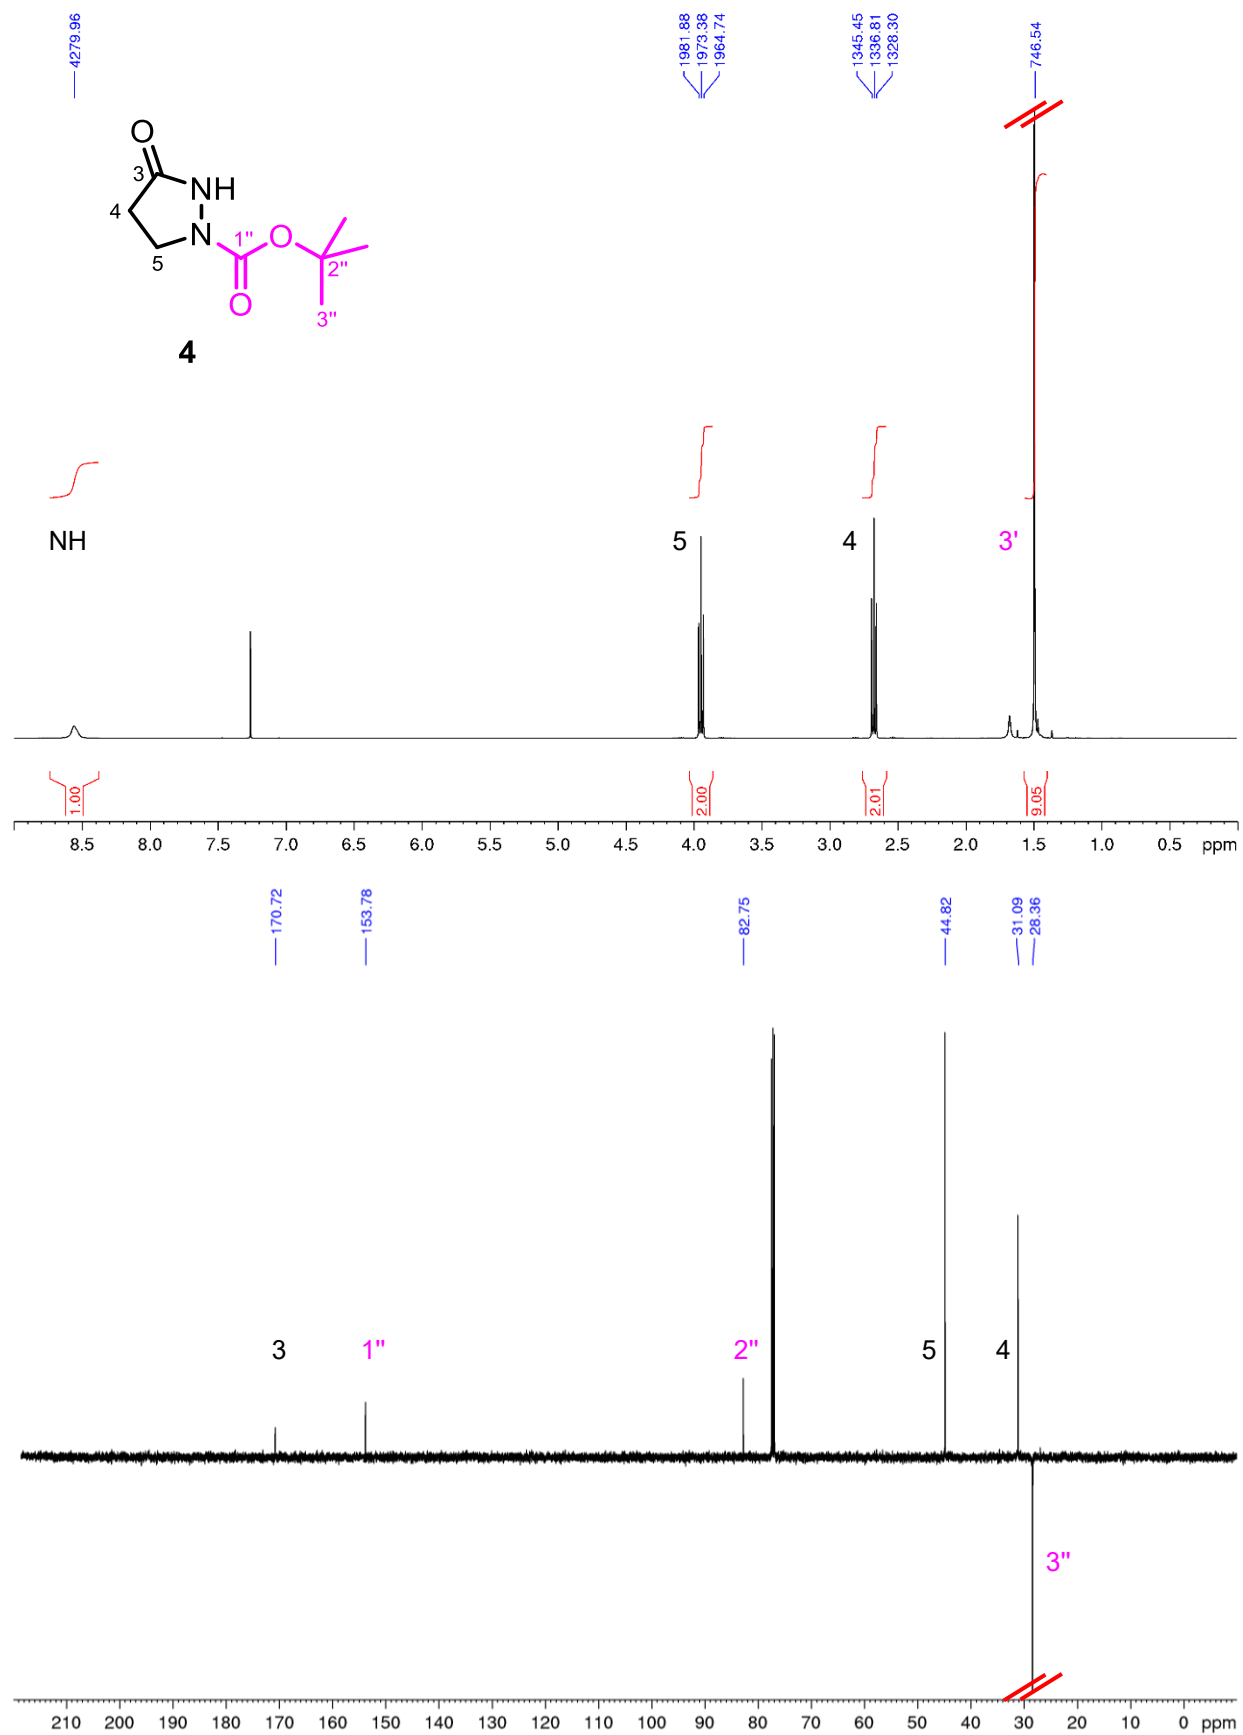

$^1\text{H}$  NMR (500 MHz,  $\text{CDCl}_3$ ) and  $^{13}\text{C}$  Jmod NMR (125 MHz,  $\text{CDCl}_3$ ) of **9a**:

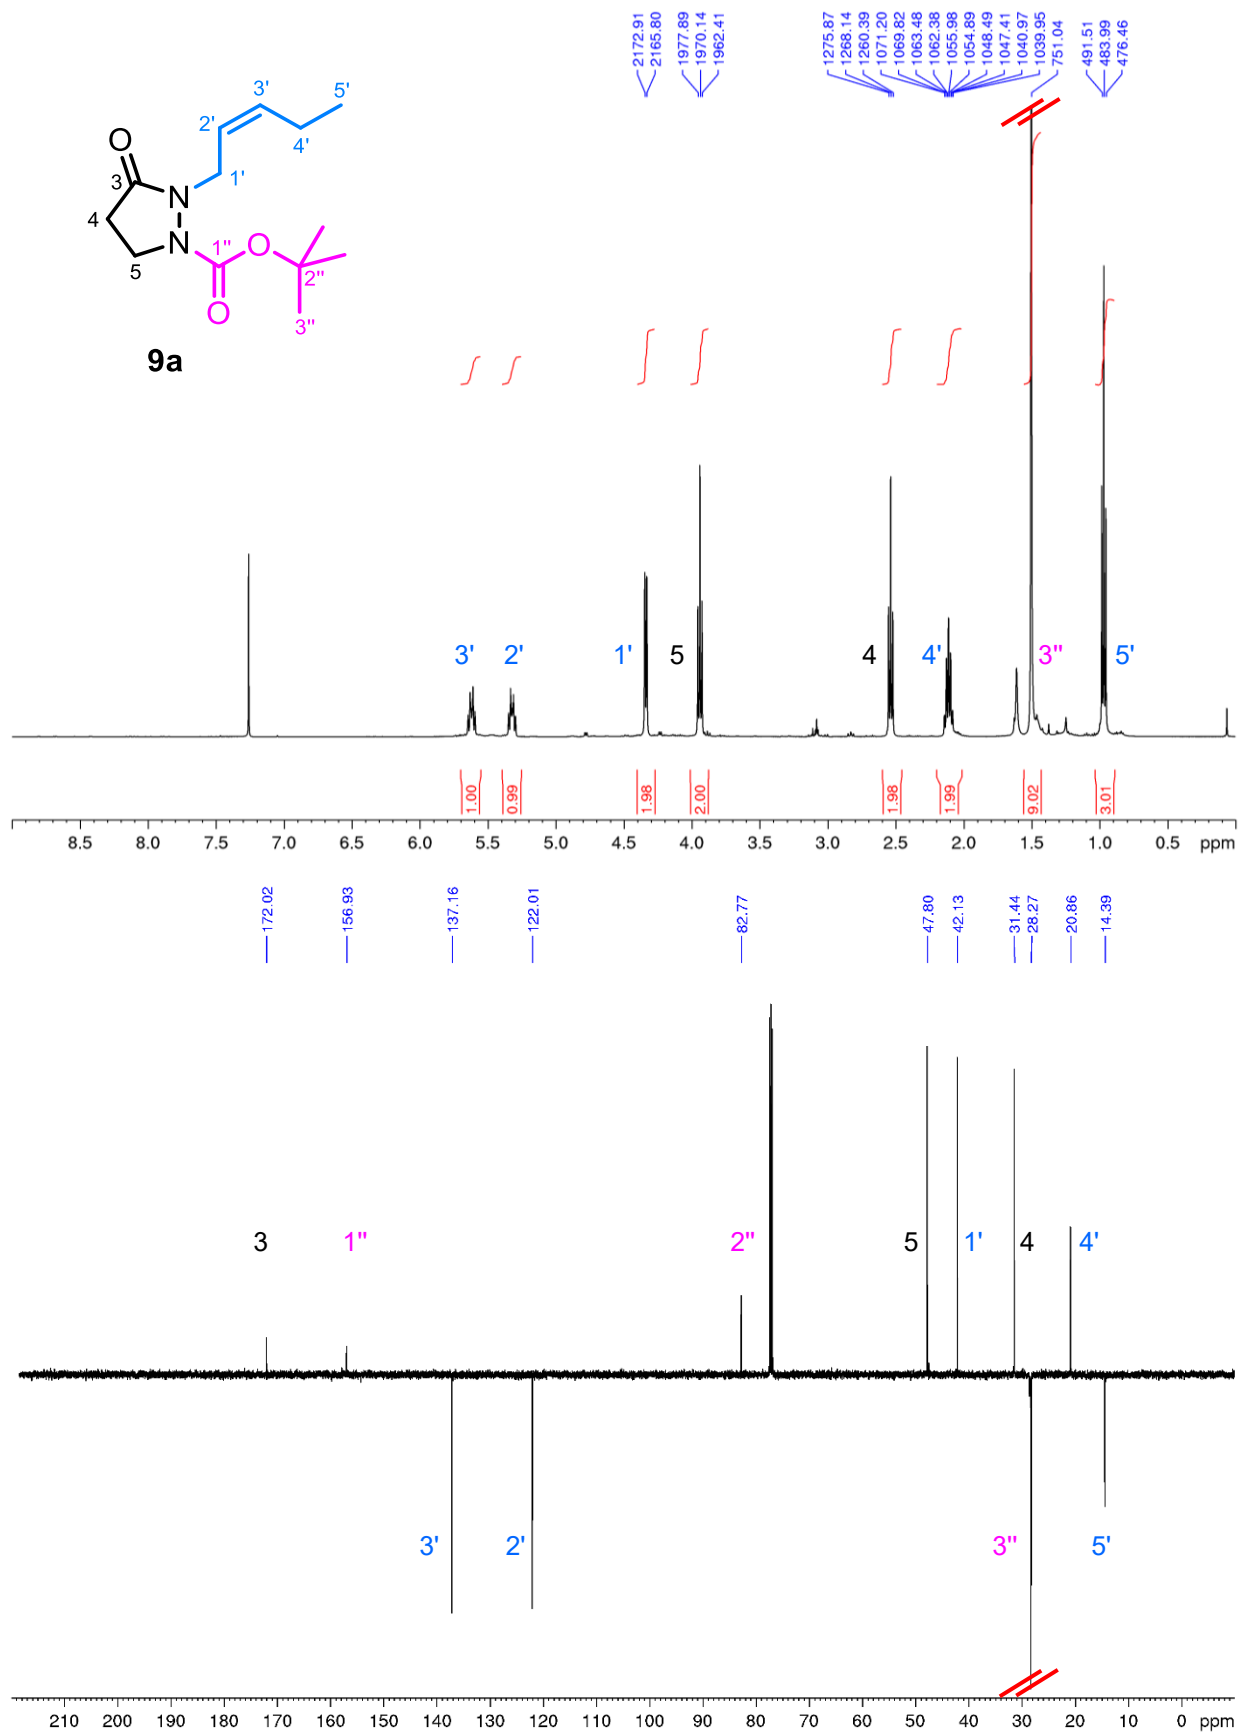

$^1\text{H}$  NMR (500 MHz,  $\text{CDCl}_3$ ) and  $^{13}\text{C}$  Jmod NMR (125 MHz,  $\text{CDCl}_3$ ) of **9b**:

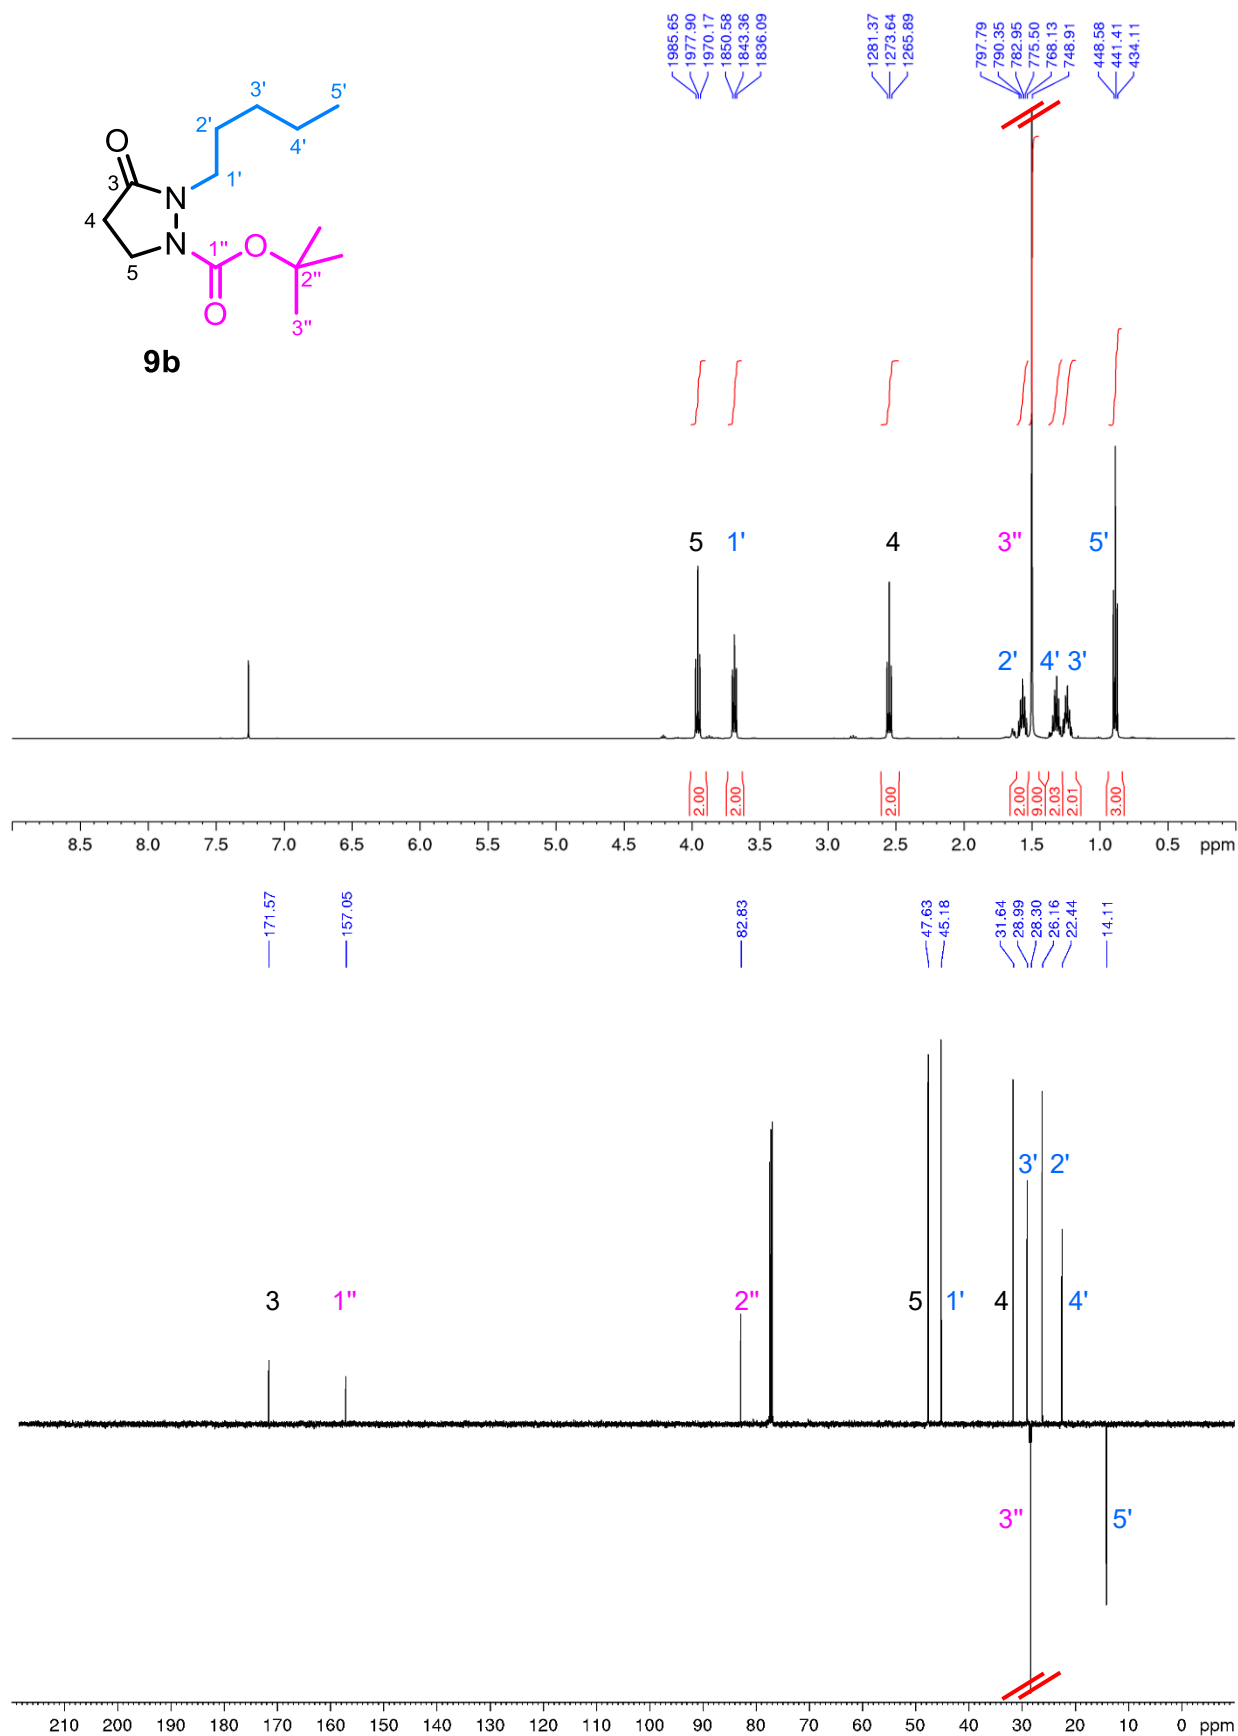



$^1\text{H}$  NMR (500 MHz,  $\text{CDCl}_3$ ) and  $^{13}\text{C}$  Jmod NMR (125 MHz,  $\text{CDCl}_3$ ) of **9d**:

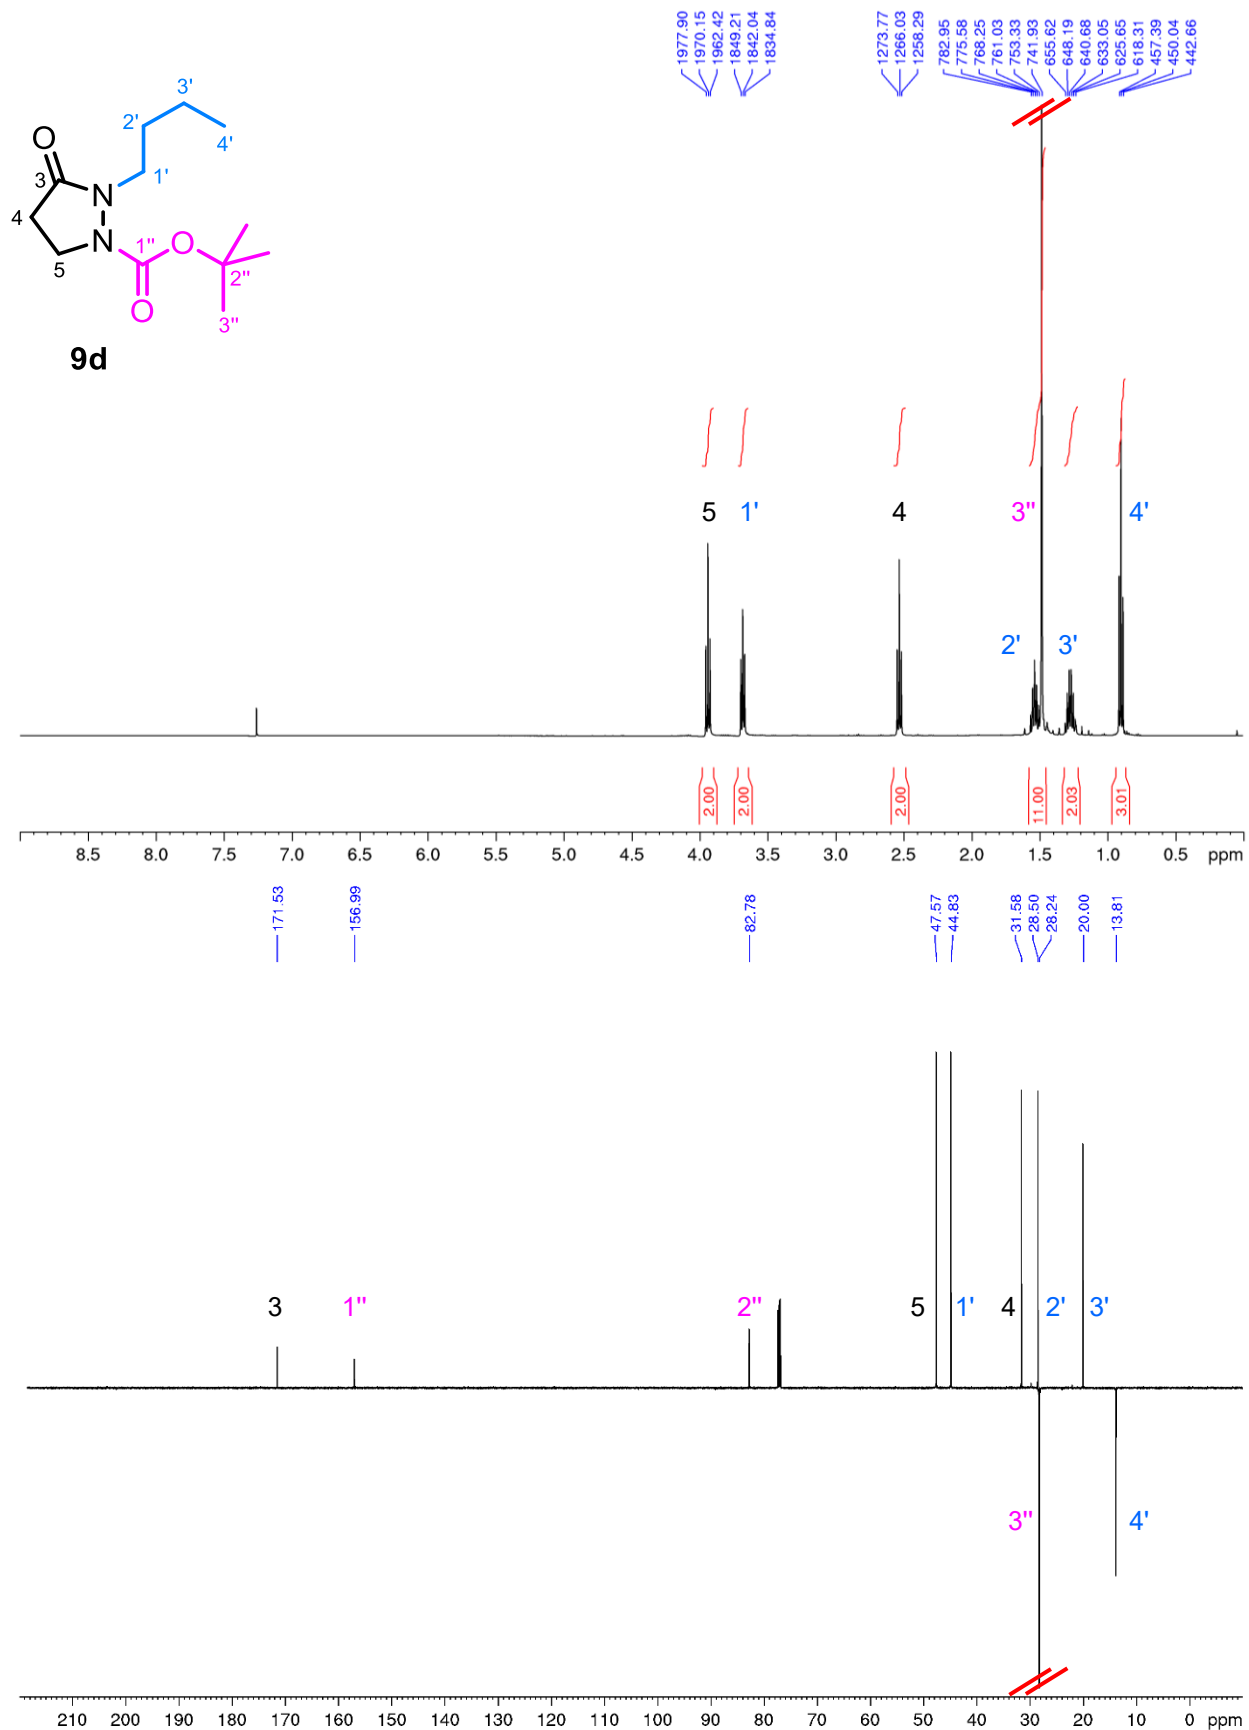

$^1\text{H}$  NMR (500 MHz,  $\text{CDCl}_3$ ) and  $^{13}\text{C}$  Jmod NMR (125 MHz,  $\text{CDCl}_3$ ) of **10a**:

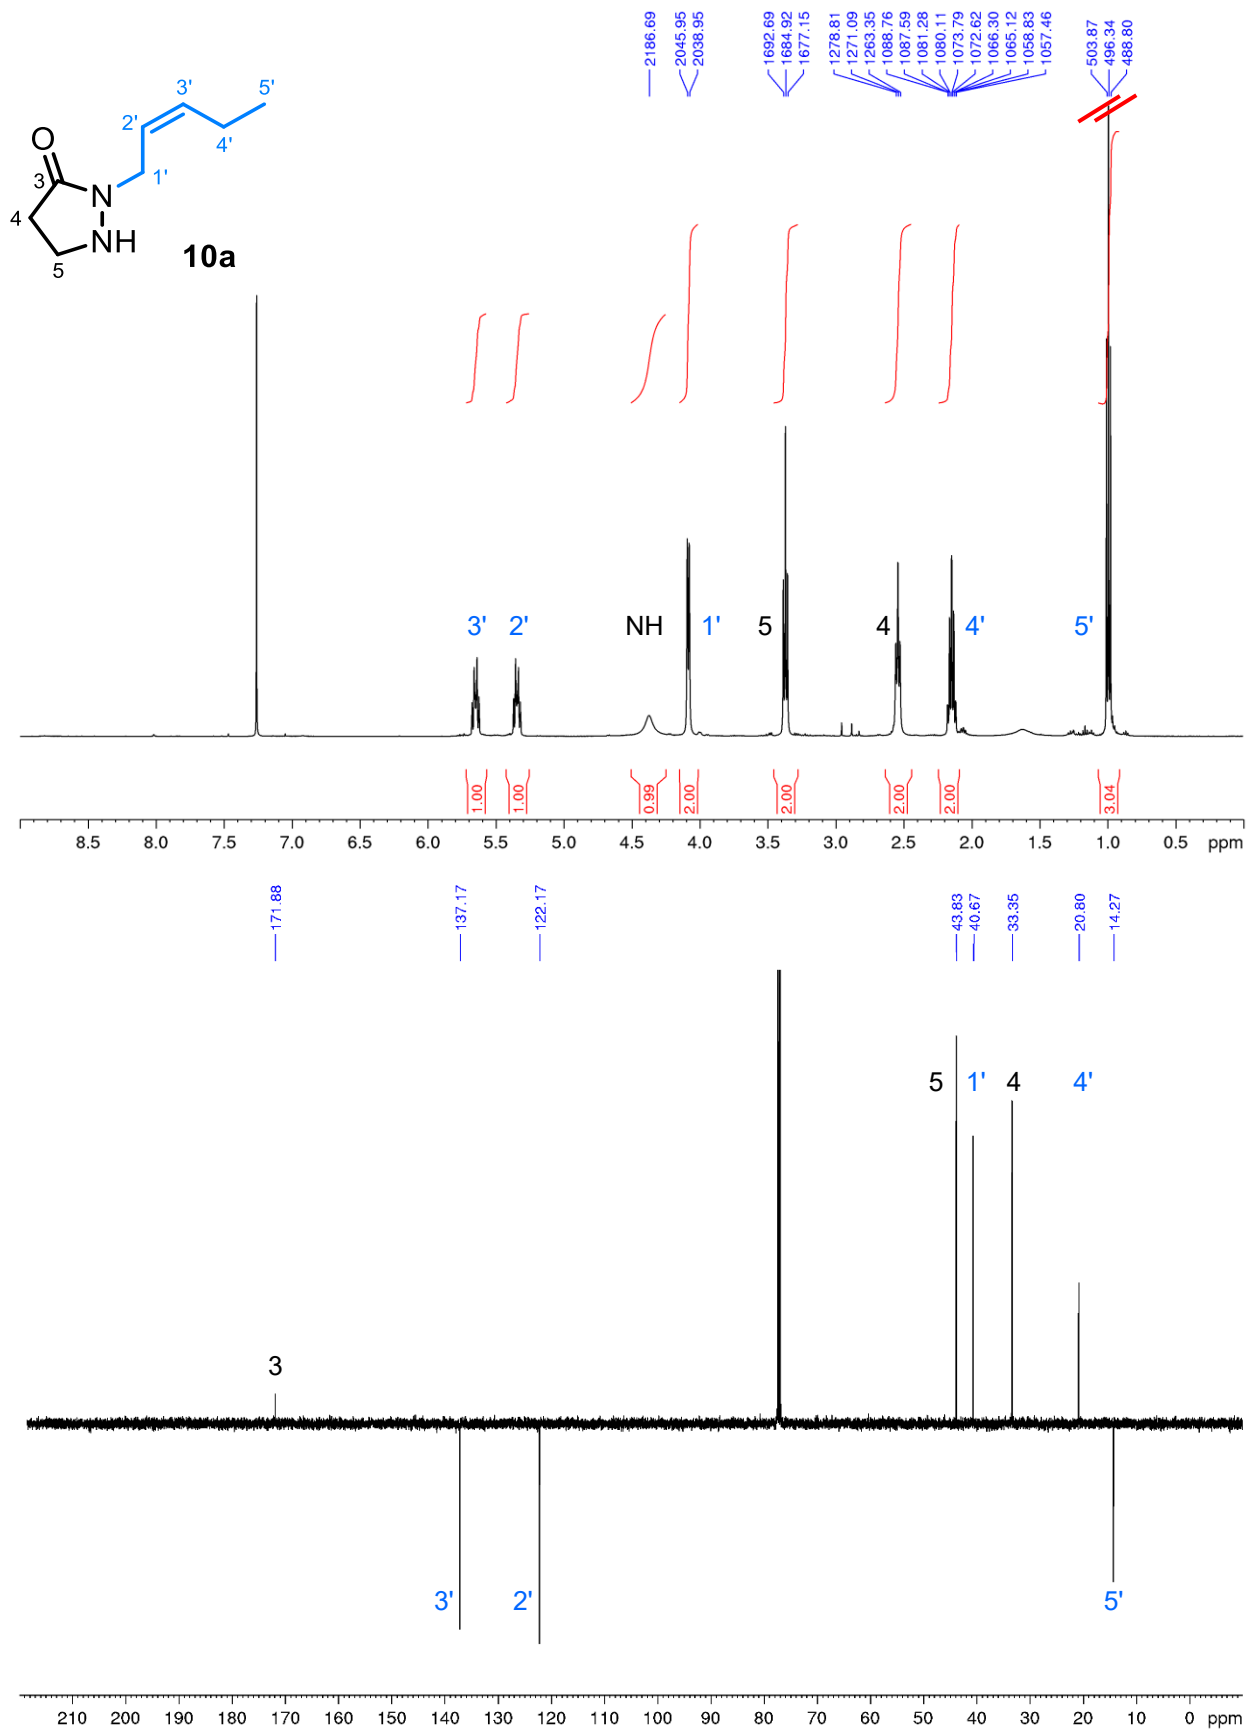

$^1\text{H}$  NMR (500 MHz,  $\text{CDCl}_3$ ) and  $^{13}\text{C}$  Jmod NMR (125 MHz,  $\text{CDCl}_3$ ) of **10b**:

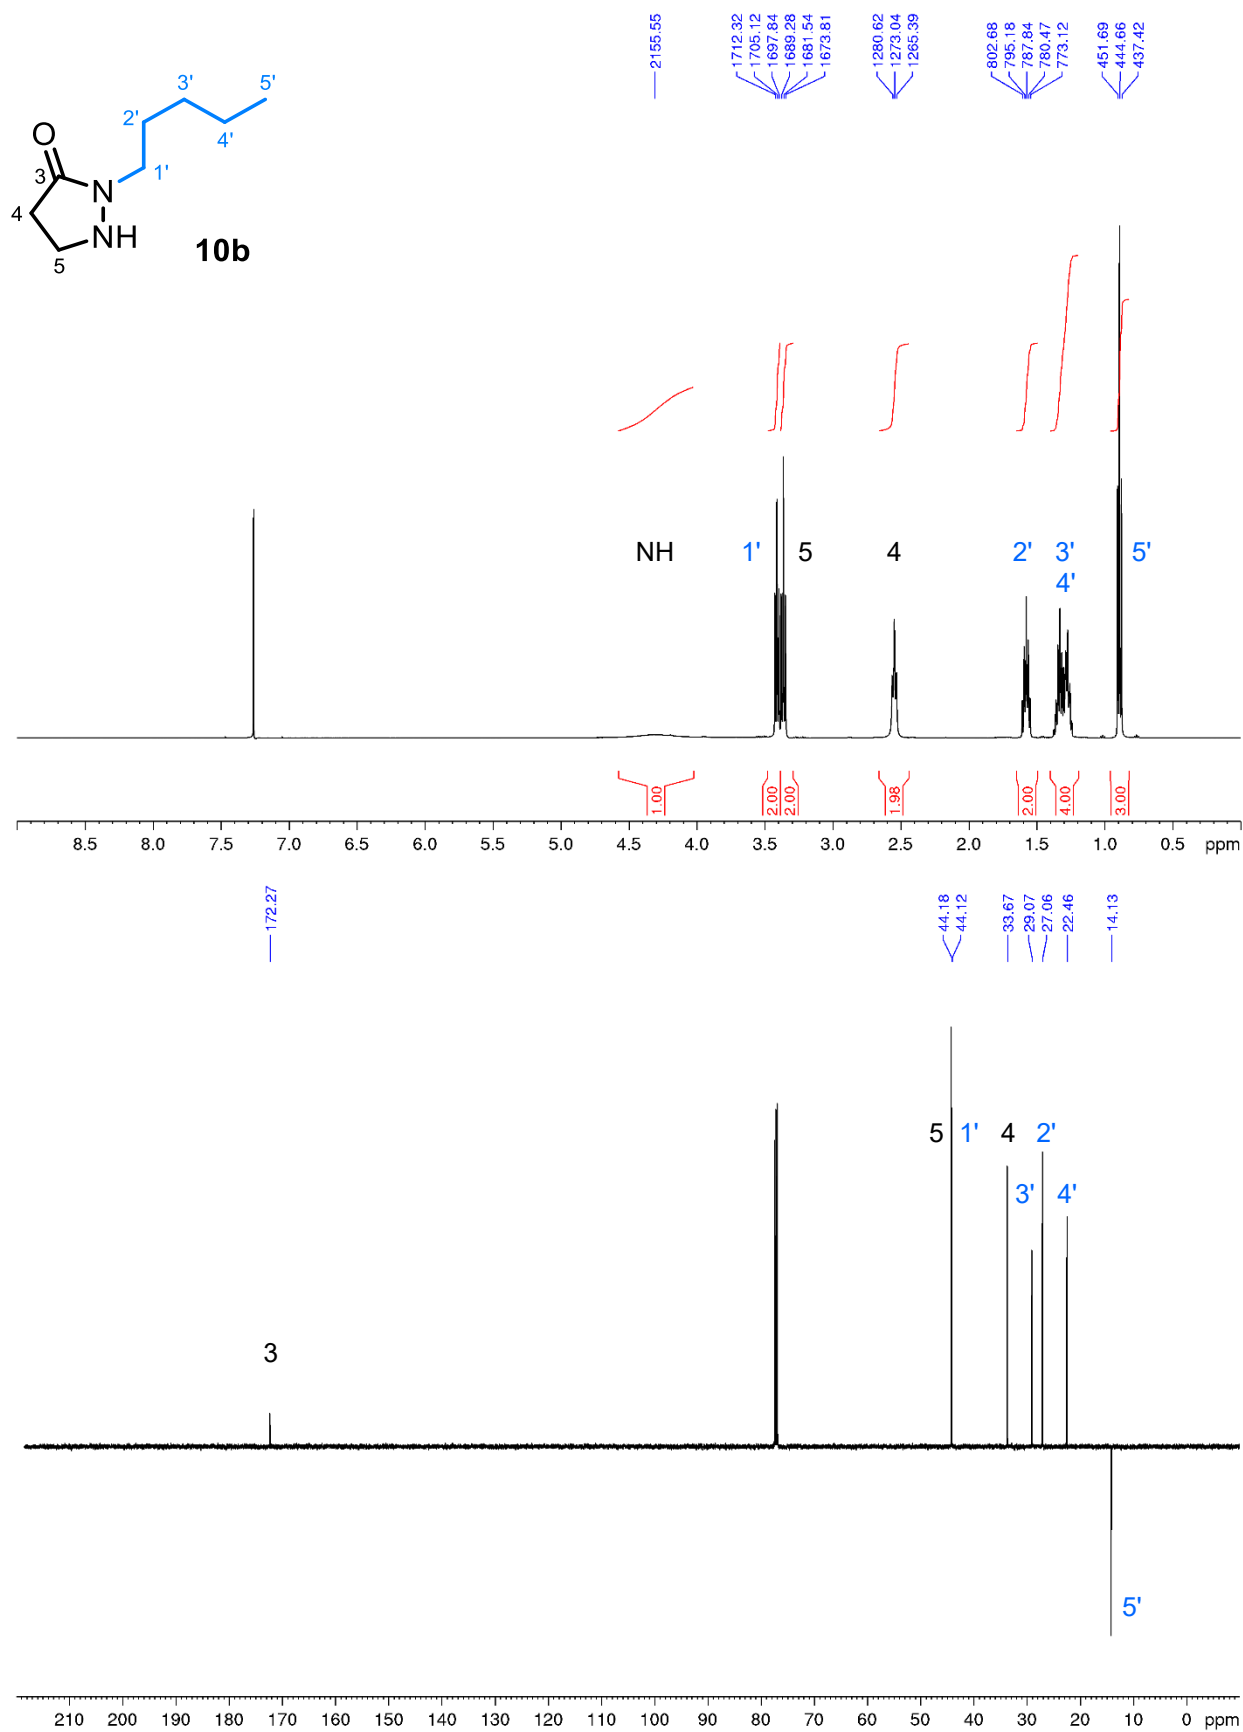



$^1\text{H}$  NMR (500 MHz,  $\text{CDCl}_3$ ) and  $^{13}\text{C}$  Jmod NMR (125 MHz,  $\text{CDCl}_3$ ) of **10c**:

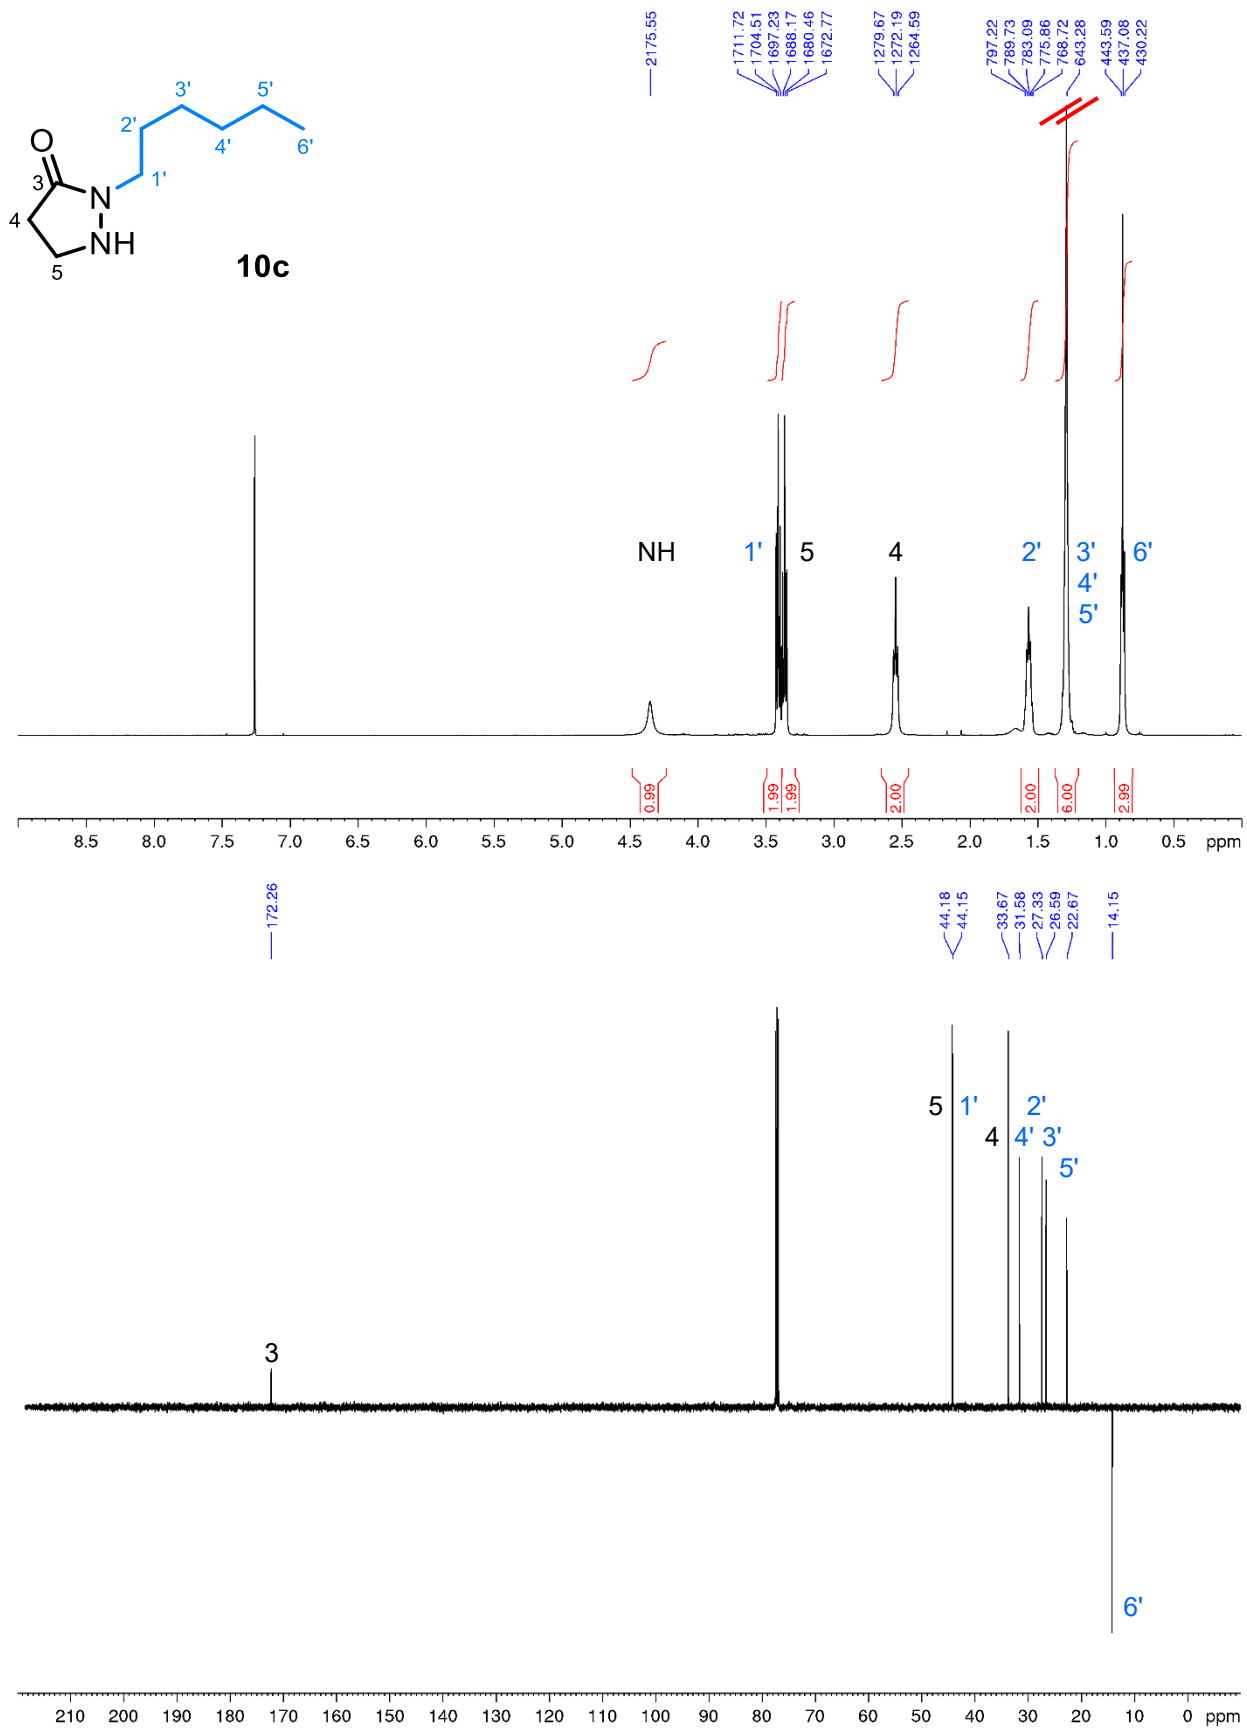

$^1\text{H}$  NMR (500 MHz,  $\text{CDCl}_3$ ) and  $^{13}\text{C}$  Jmod NMR (125 MHz,  $\text{CDCl}_3$ ) of **10d**:

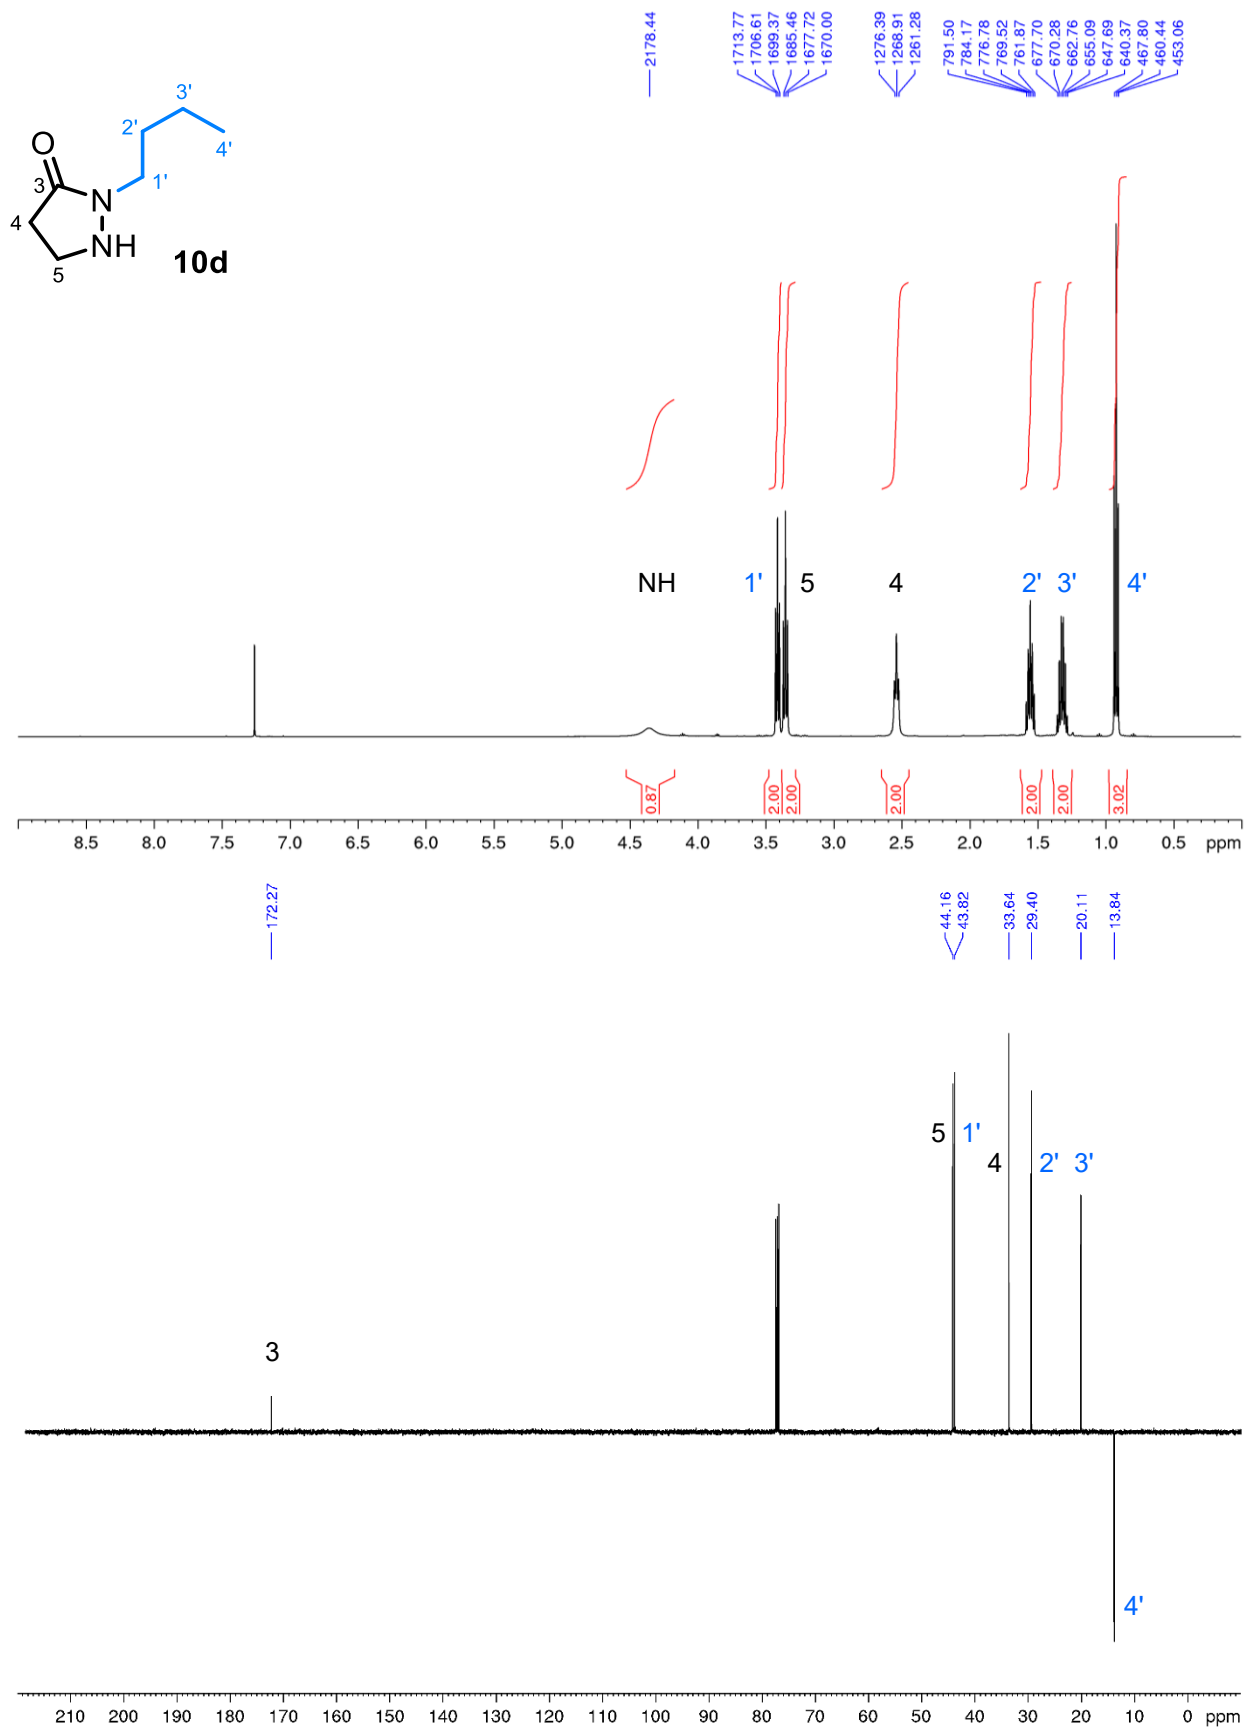

$^1\text{H}$  NMR (500 MHz,  $\text{CDCl}_3$ ) and  $^{13}\text{C}$  Jmod NMR (125 MHz,  $\text{CDCl}_3$ ) of **12ae**:

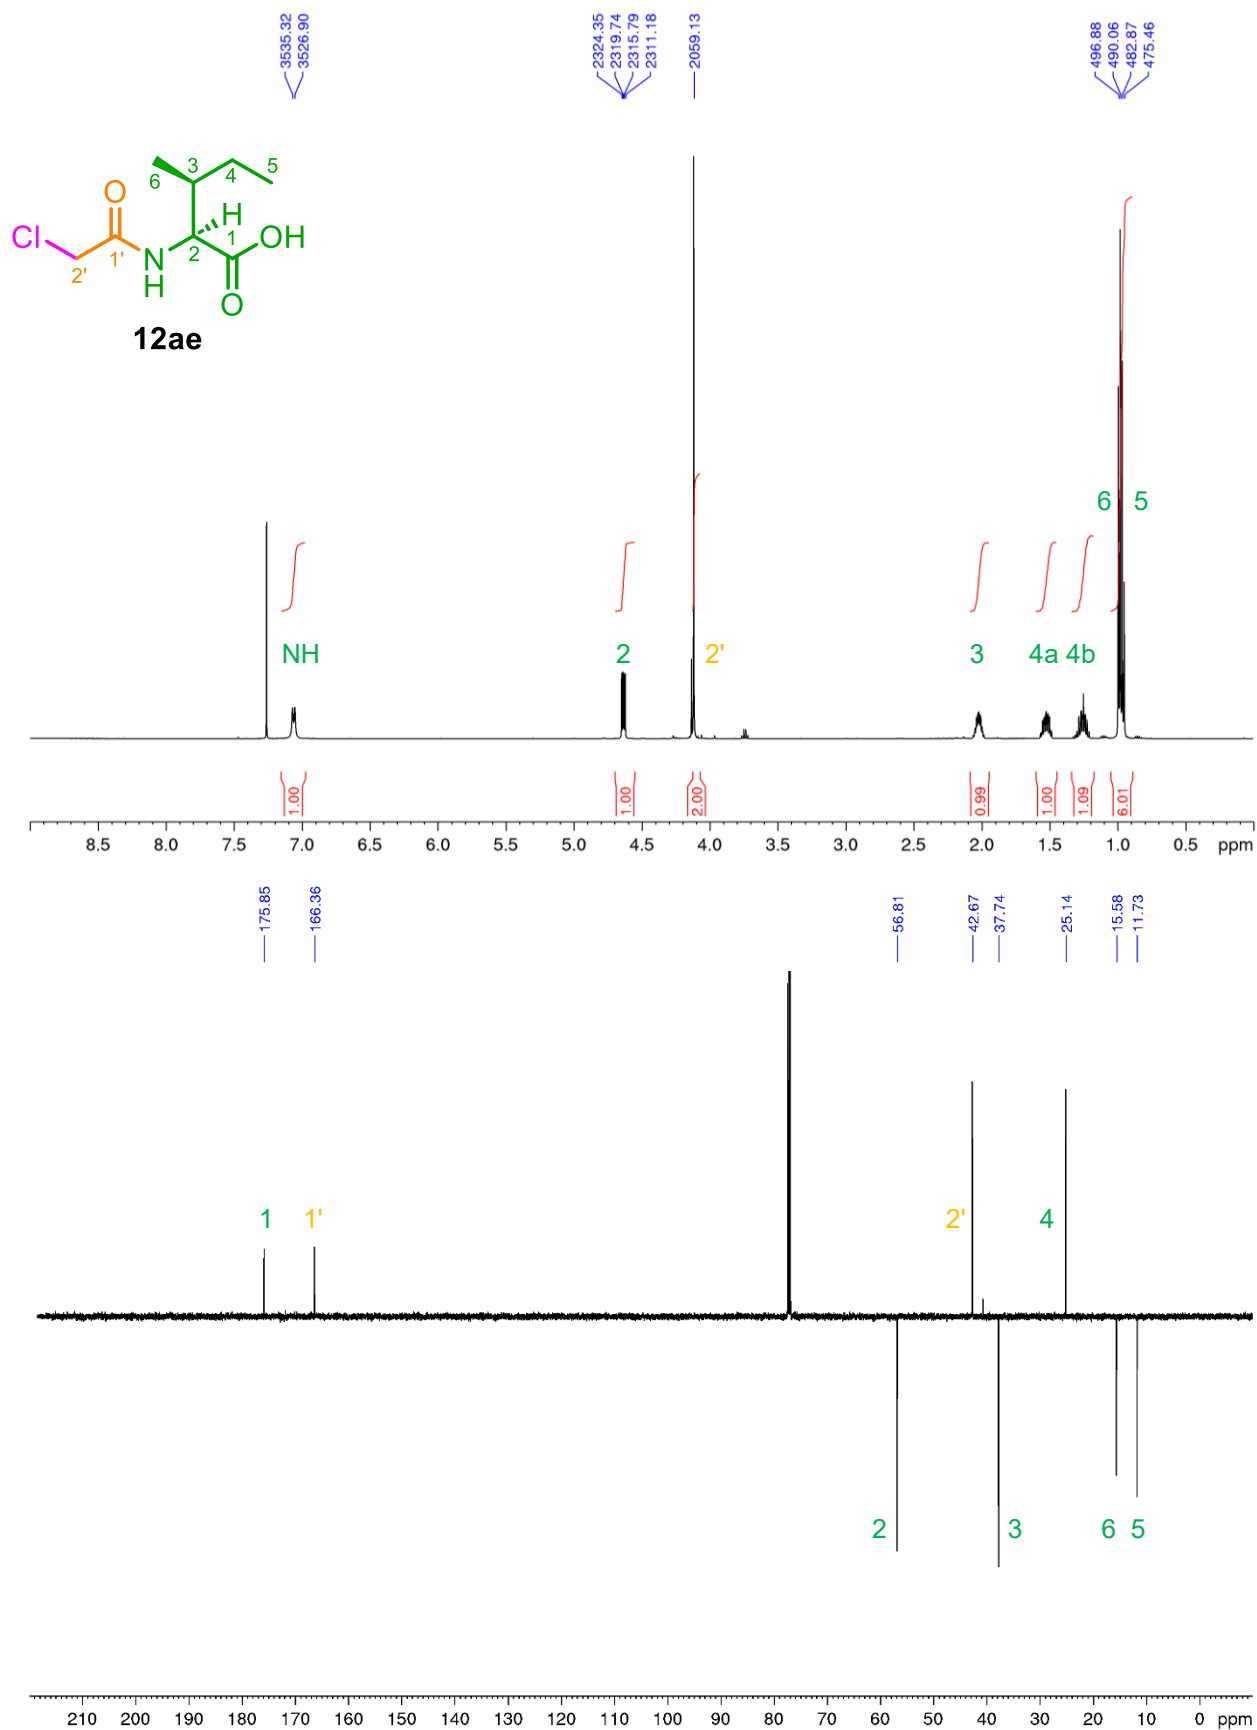

$^1\text{H}$  NMR (500 MHz,  $\text{CDCl}_3$ ) and  $^{13}\text{C}$  Jmod NMR (125 MHz,  $\text{CDCl}_3$ ) of **6aa**:

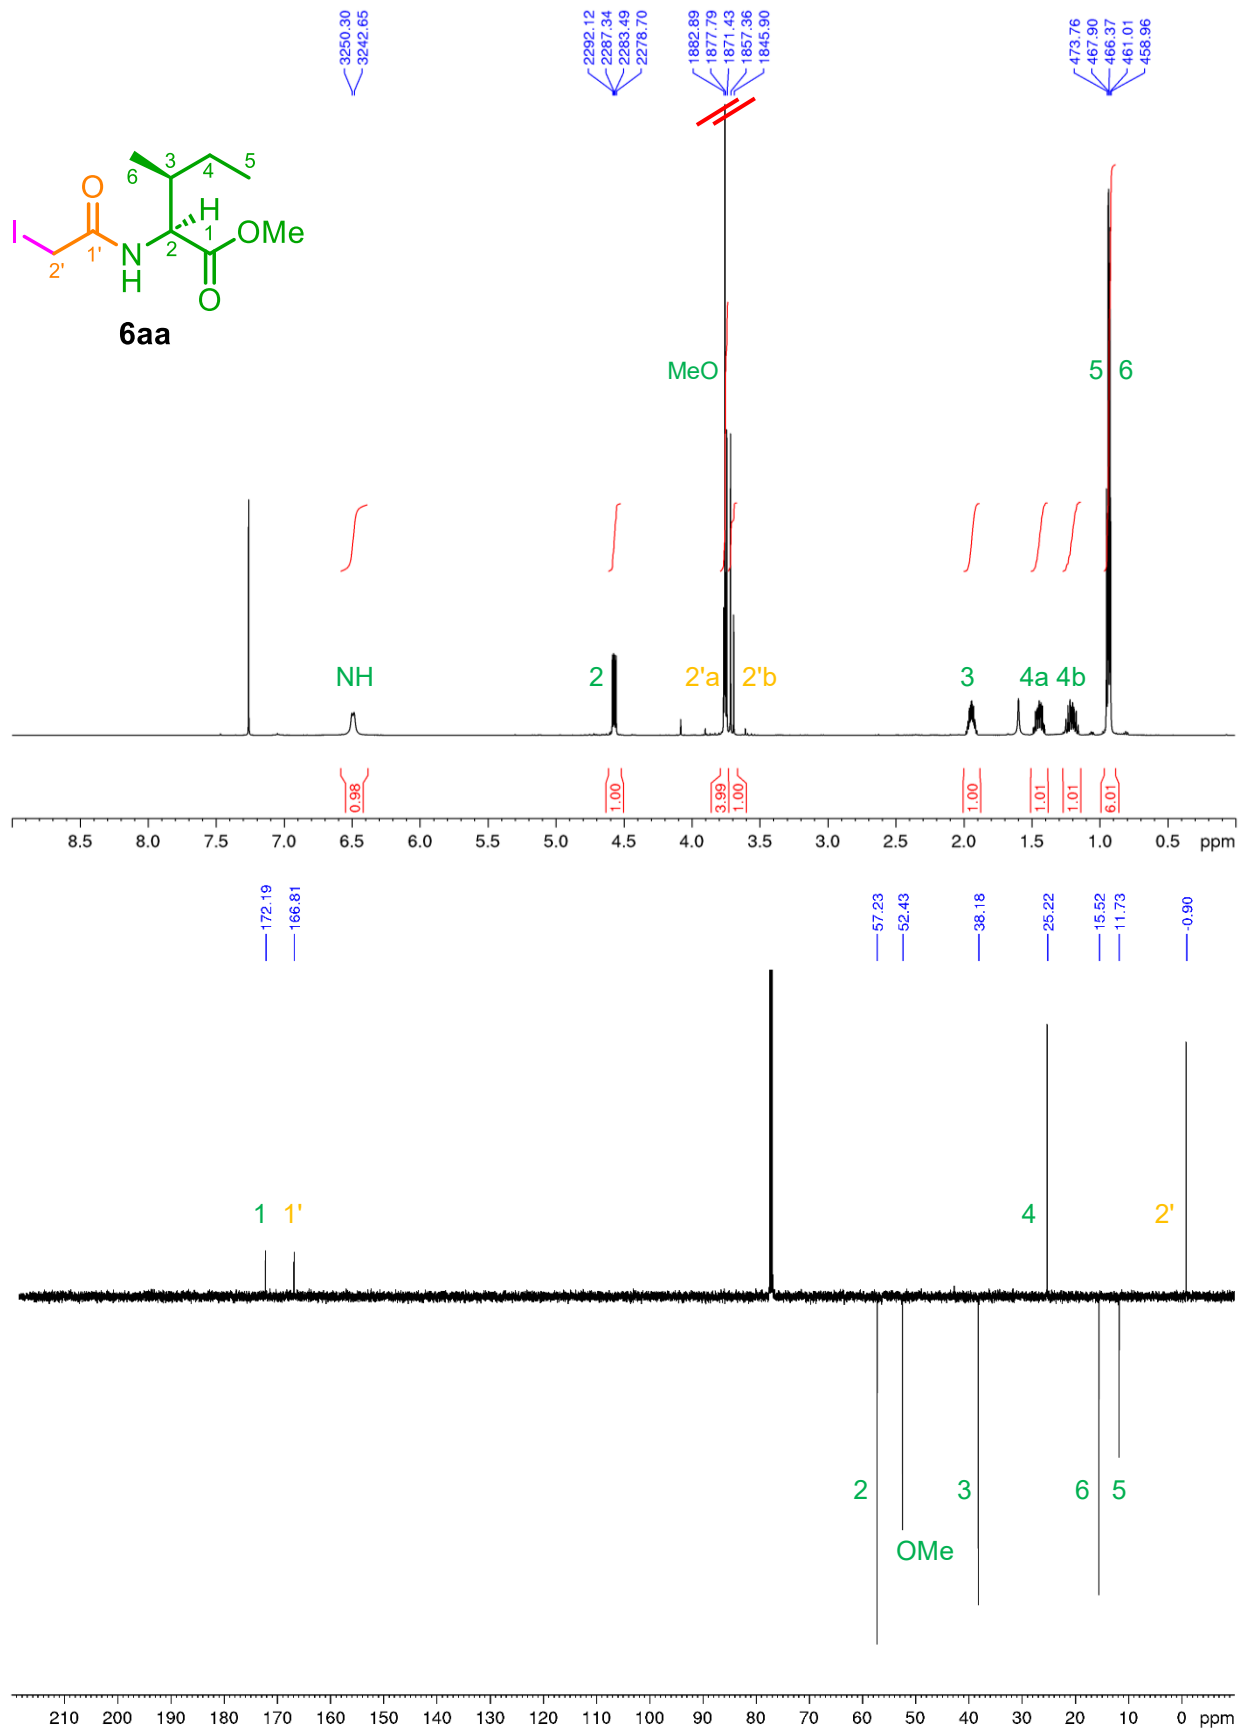

$^1\text{H}$  NMR (500 MHz,  $\text{CDCl}_3$ ) and  $^{13}\text{C}$  Jmod NMR (125 MHz,  $\text{CDCl}_3$ ) of **6ab**:

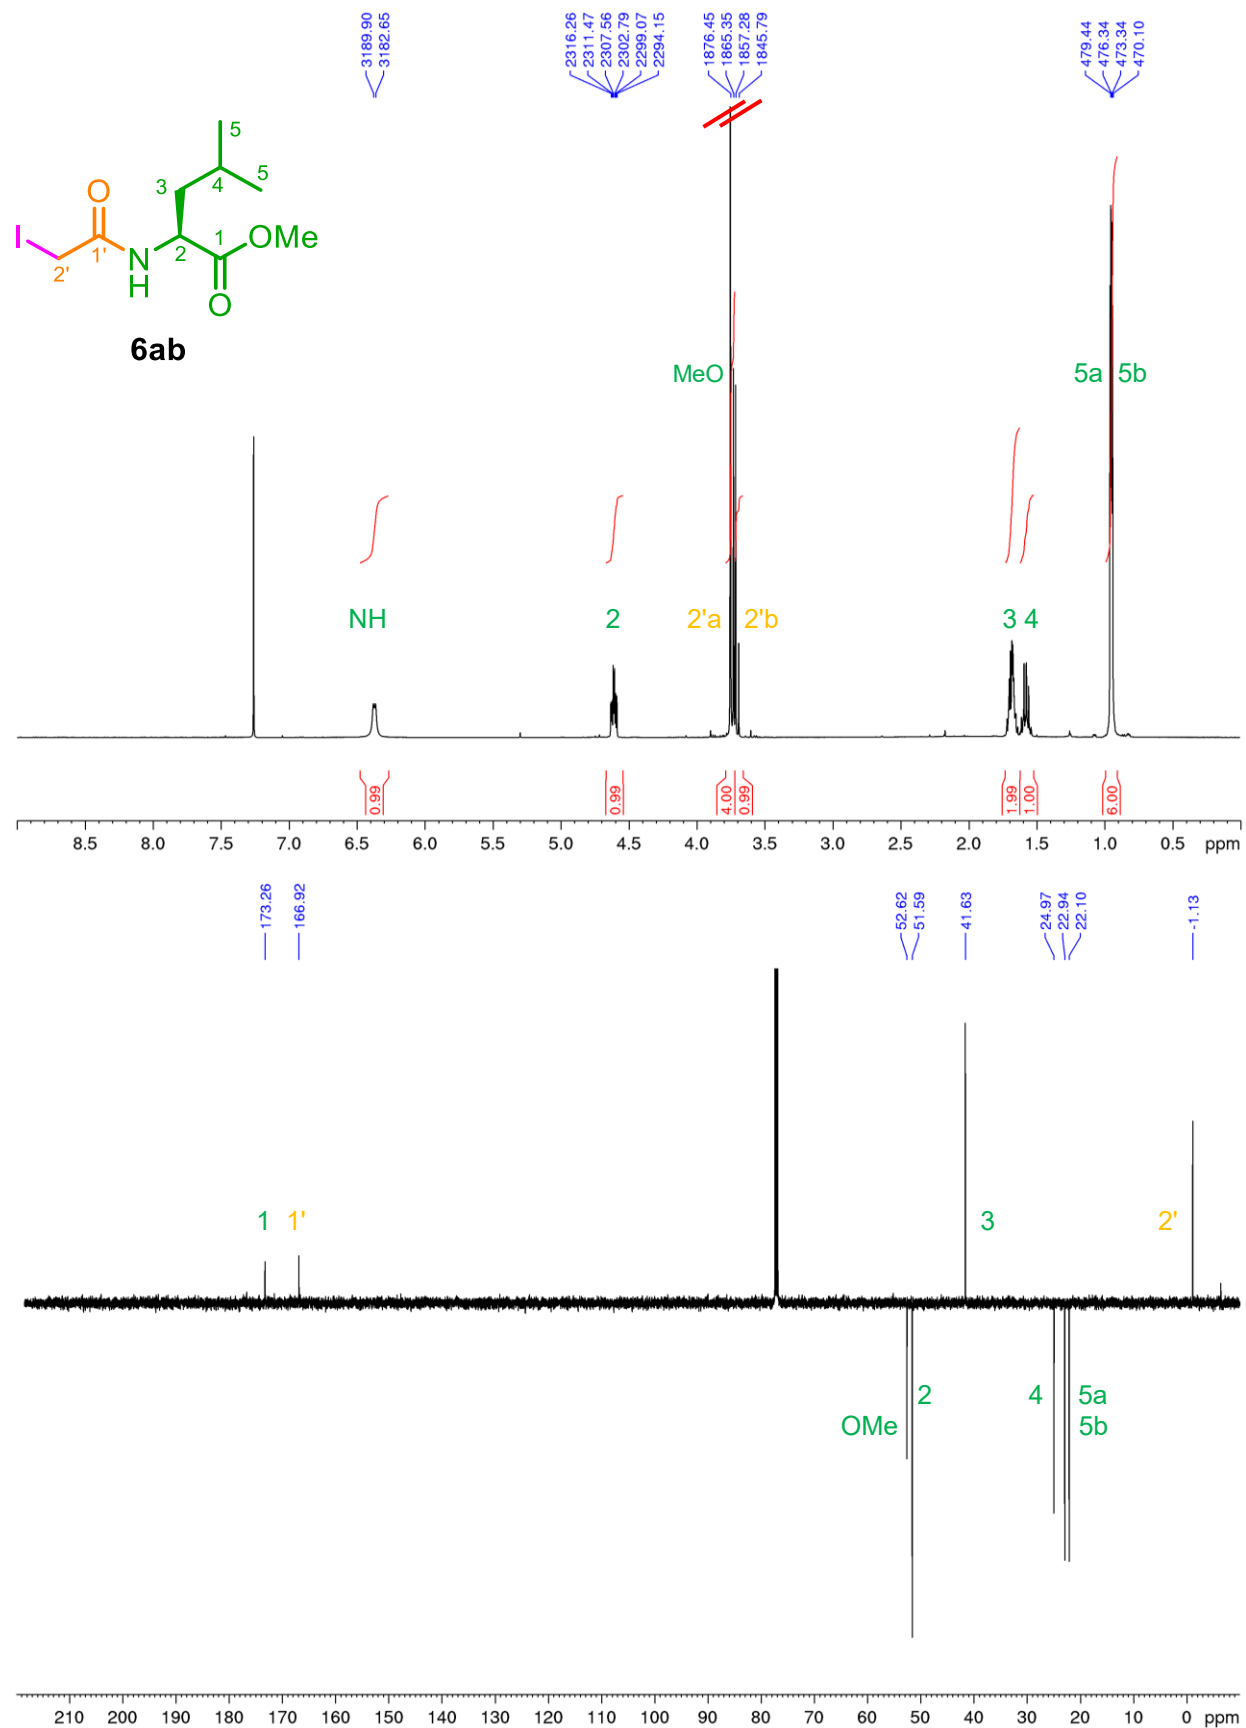

<sup>1</sup>H NMR (500 MHz, CDCl<sub>3</sub>) and <sup>13</sup>C Jmod NMR (125 MHz, CDCl<sub>3</sub>) of **6ac**:

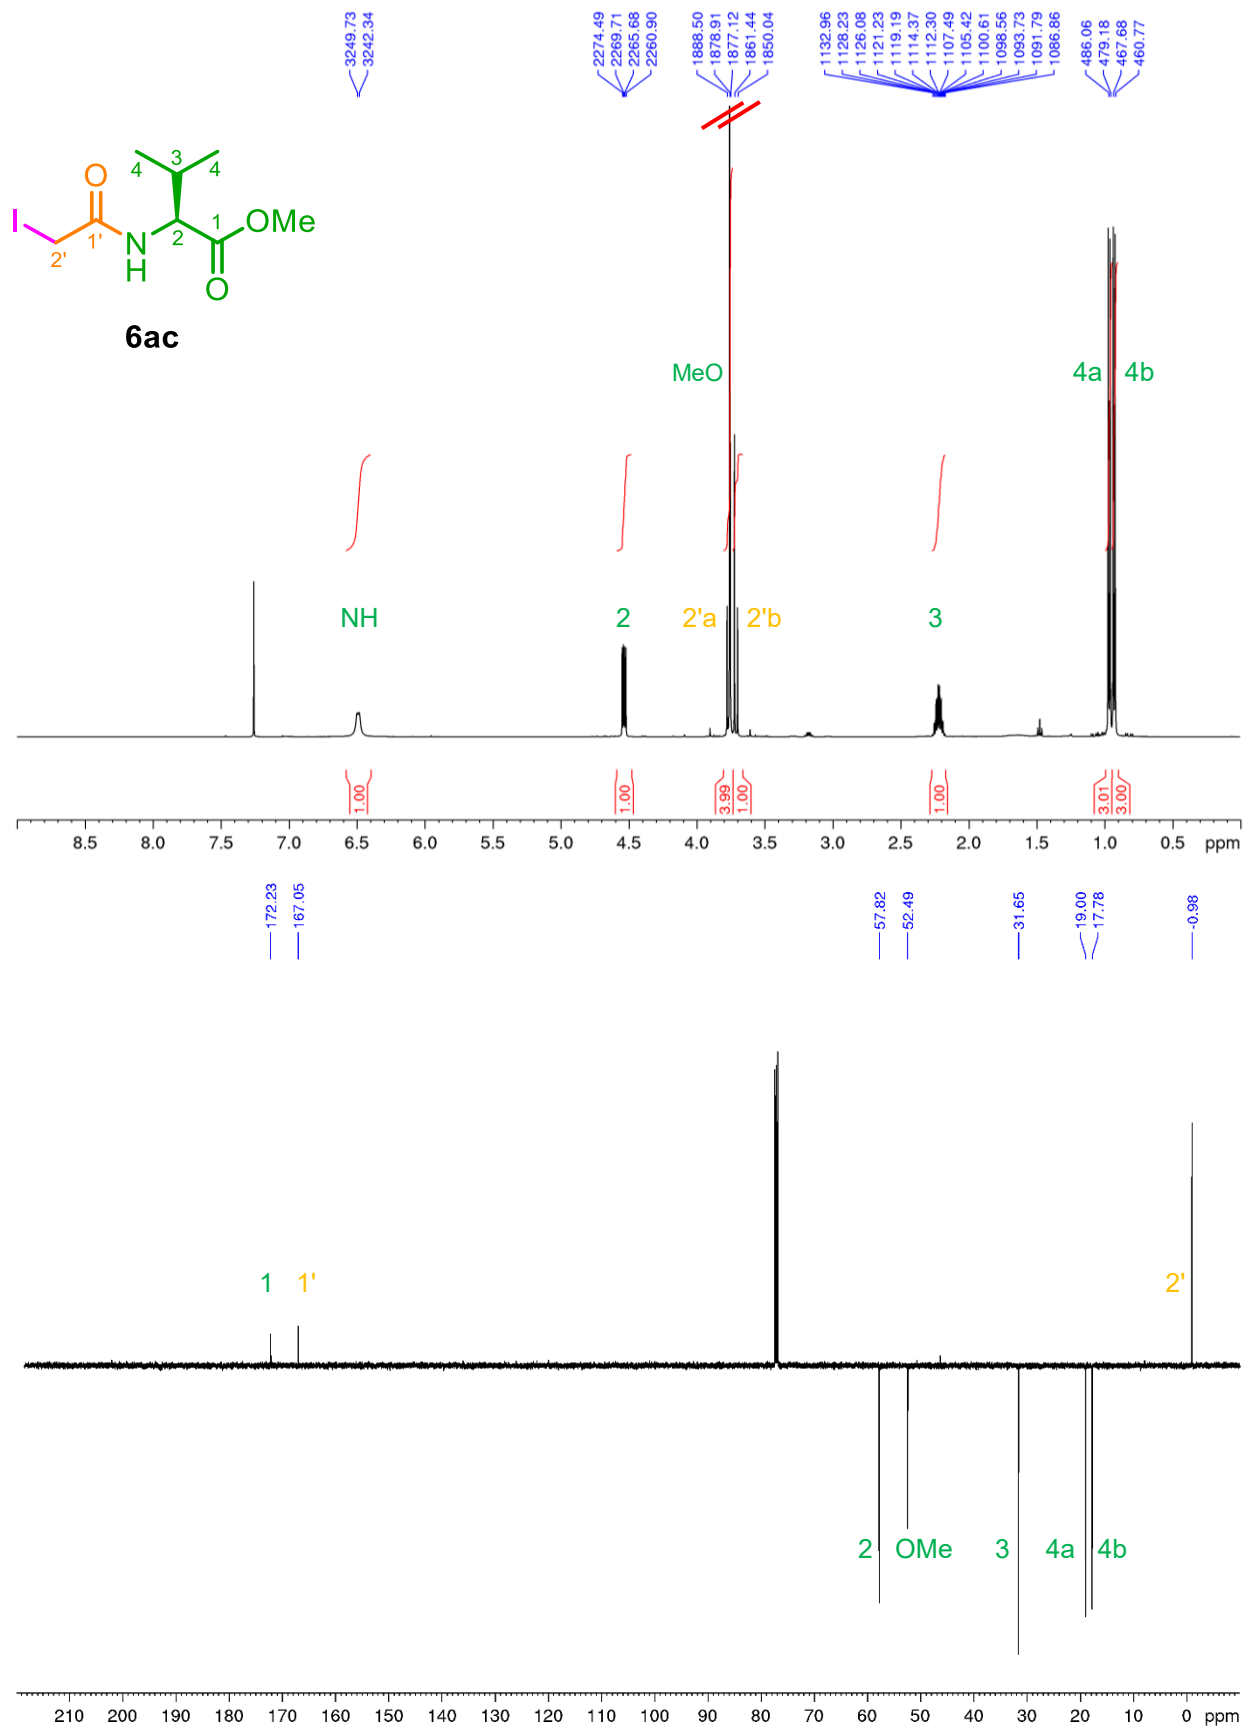

$^1\text{H}$  NMR (500 MHz,  $\text{CDCl}_3$ ) and  $^{13}\text{C}$  Jmod NMR (125 MHz,  $\text{CDCl}_3$ ) of **6ad**:

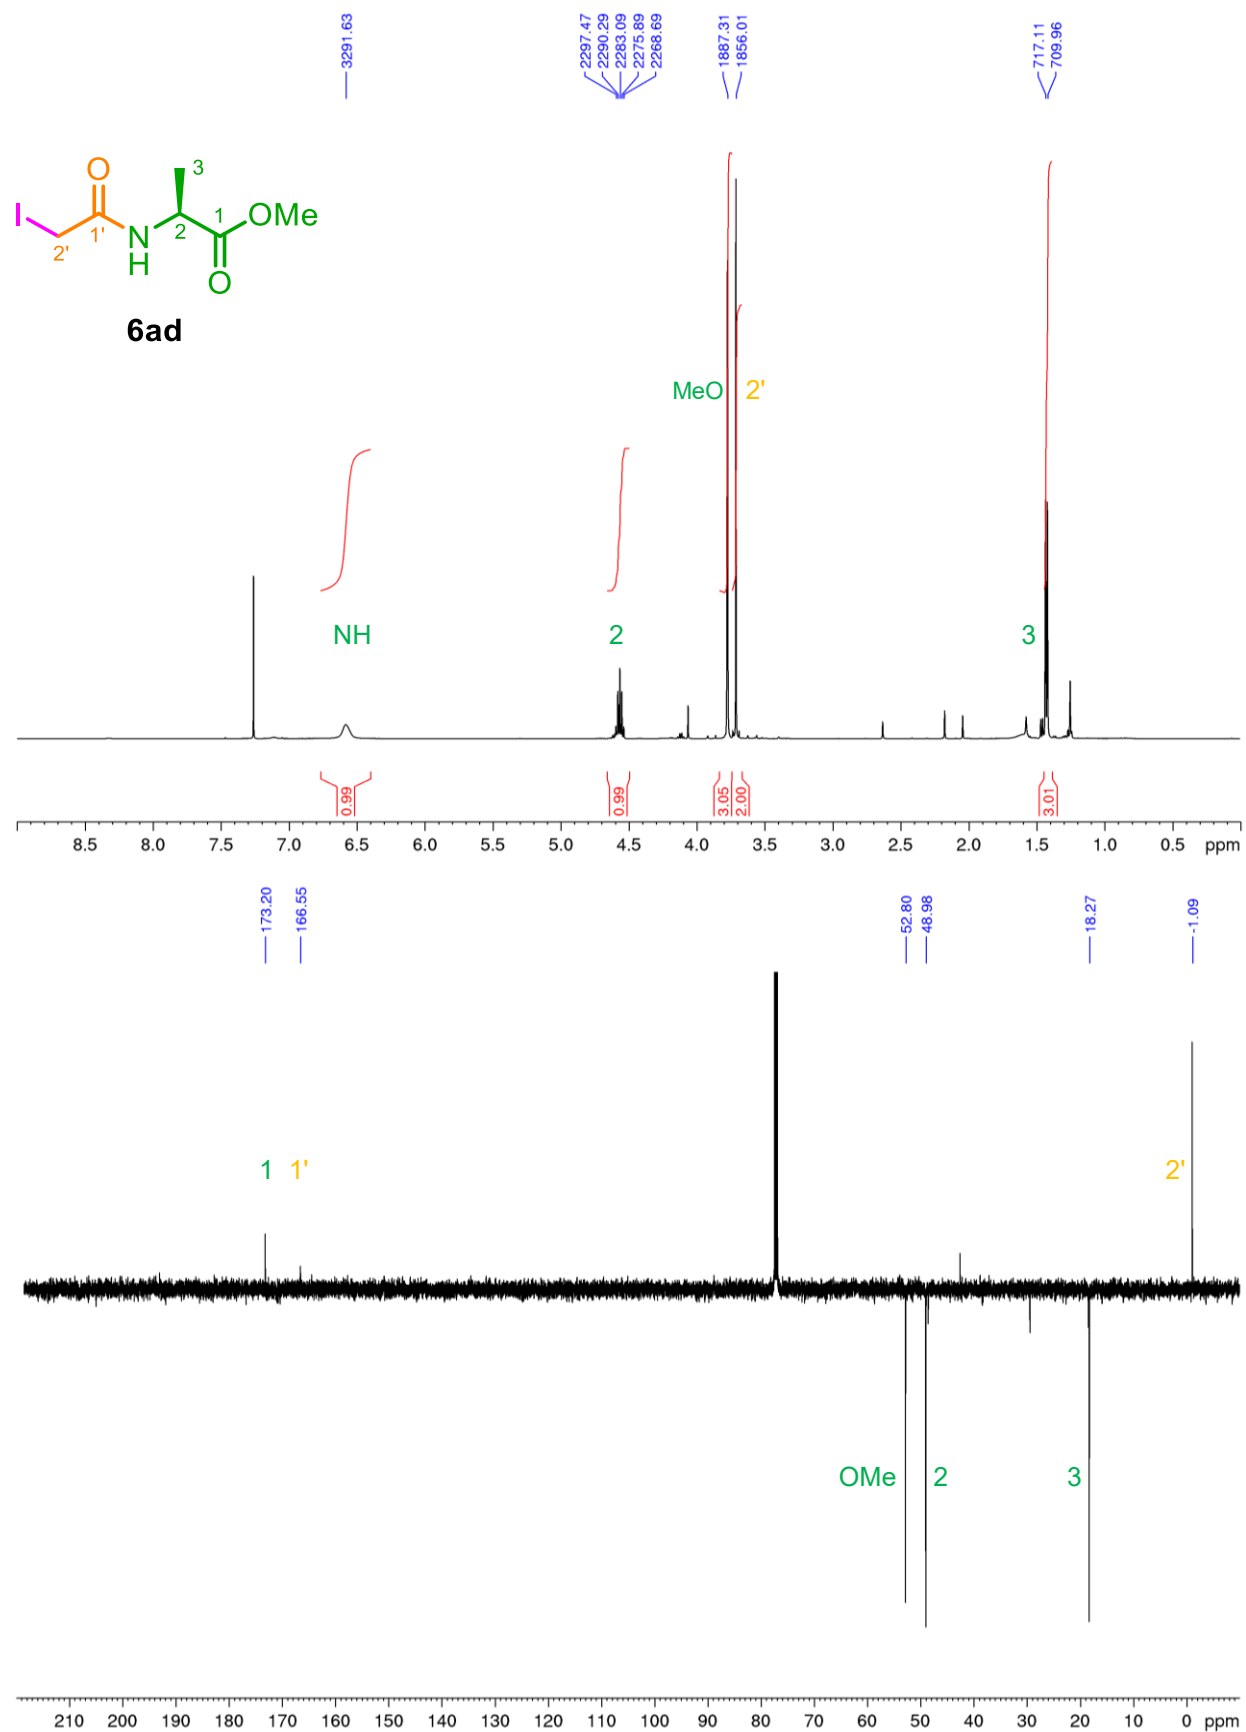

$^1\text{H}$  NMR (500 MHz,  $\text{CD}_3\text{OD}$ ) and  $^{13}\text{C}$  Jmod NMR (125 MHz,  $\text{CD}_3\text{OD}$ ) of **6ae**:

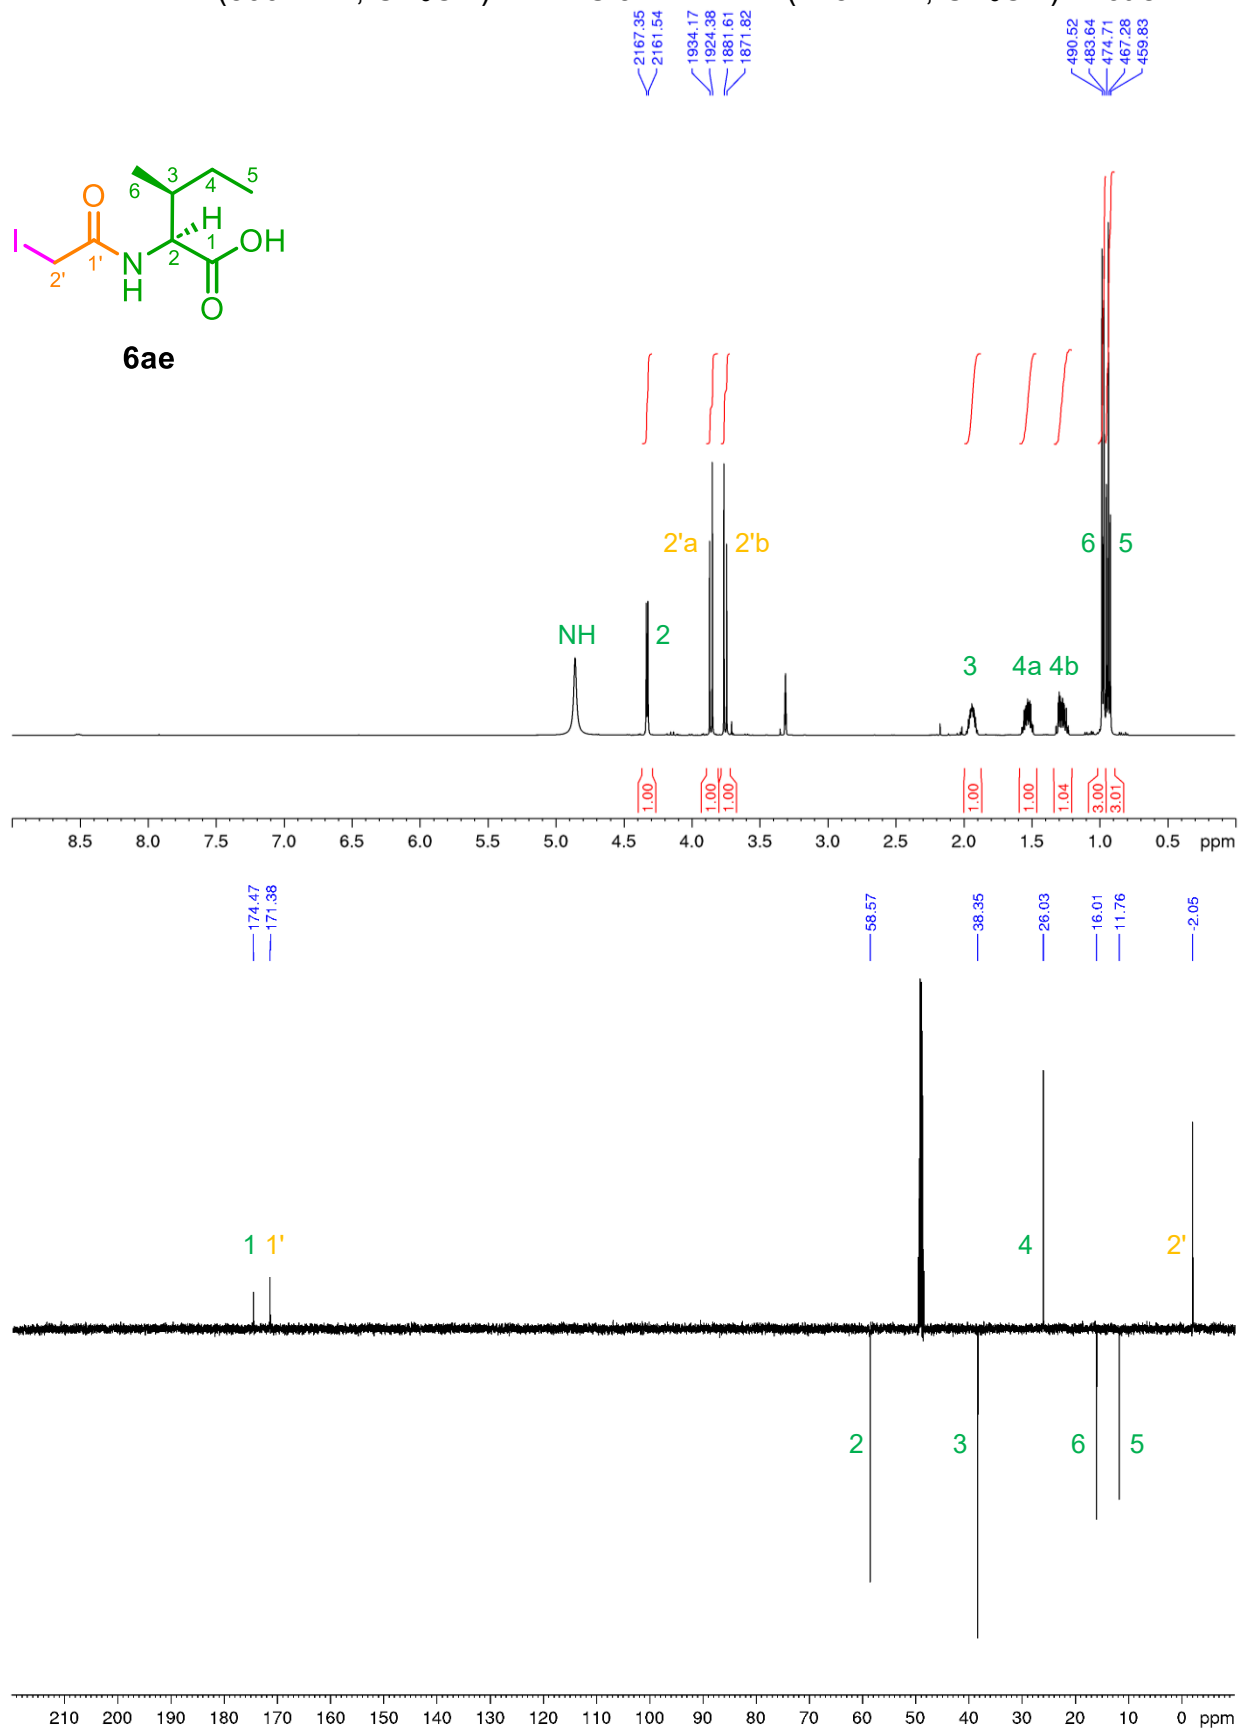



$^1\text{H}$  NMR (500 MHz,  $\text{CDCl}_3$ ) and  $^{13}\text{C}$  Jmod NMR (125 MHz,  $\text{CDCl}_3$ ) of **6ba**:

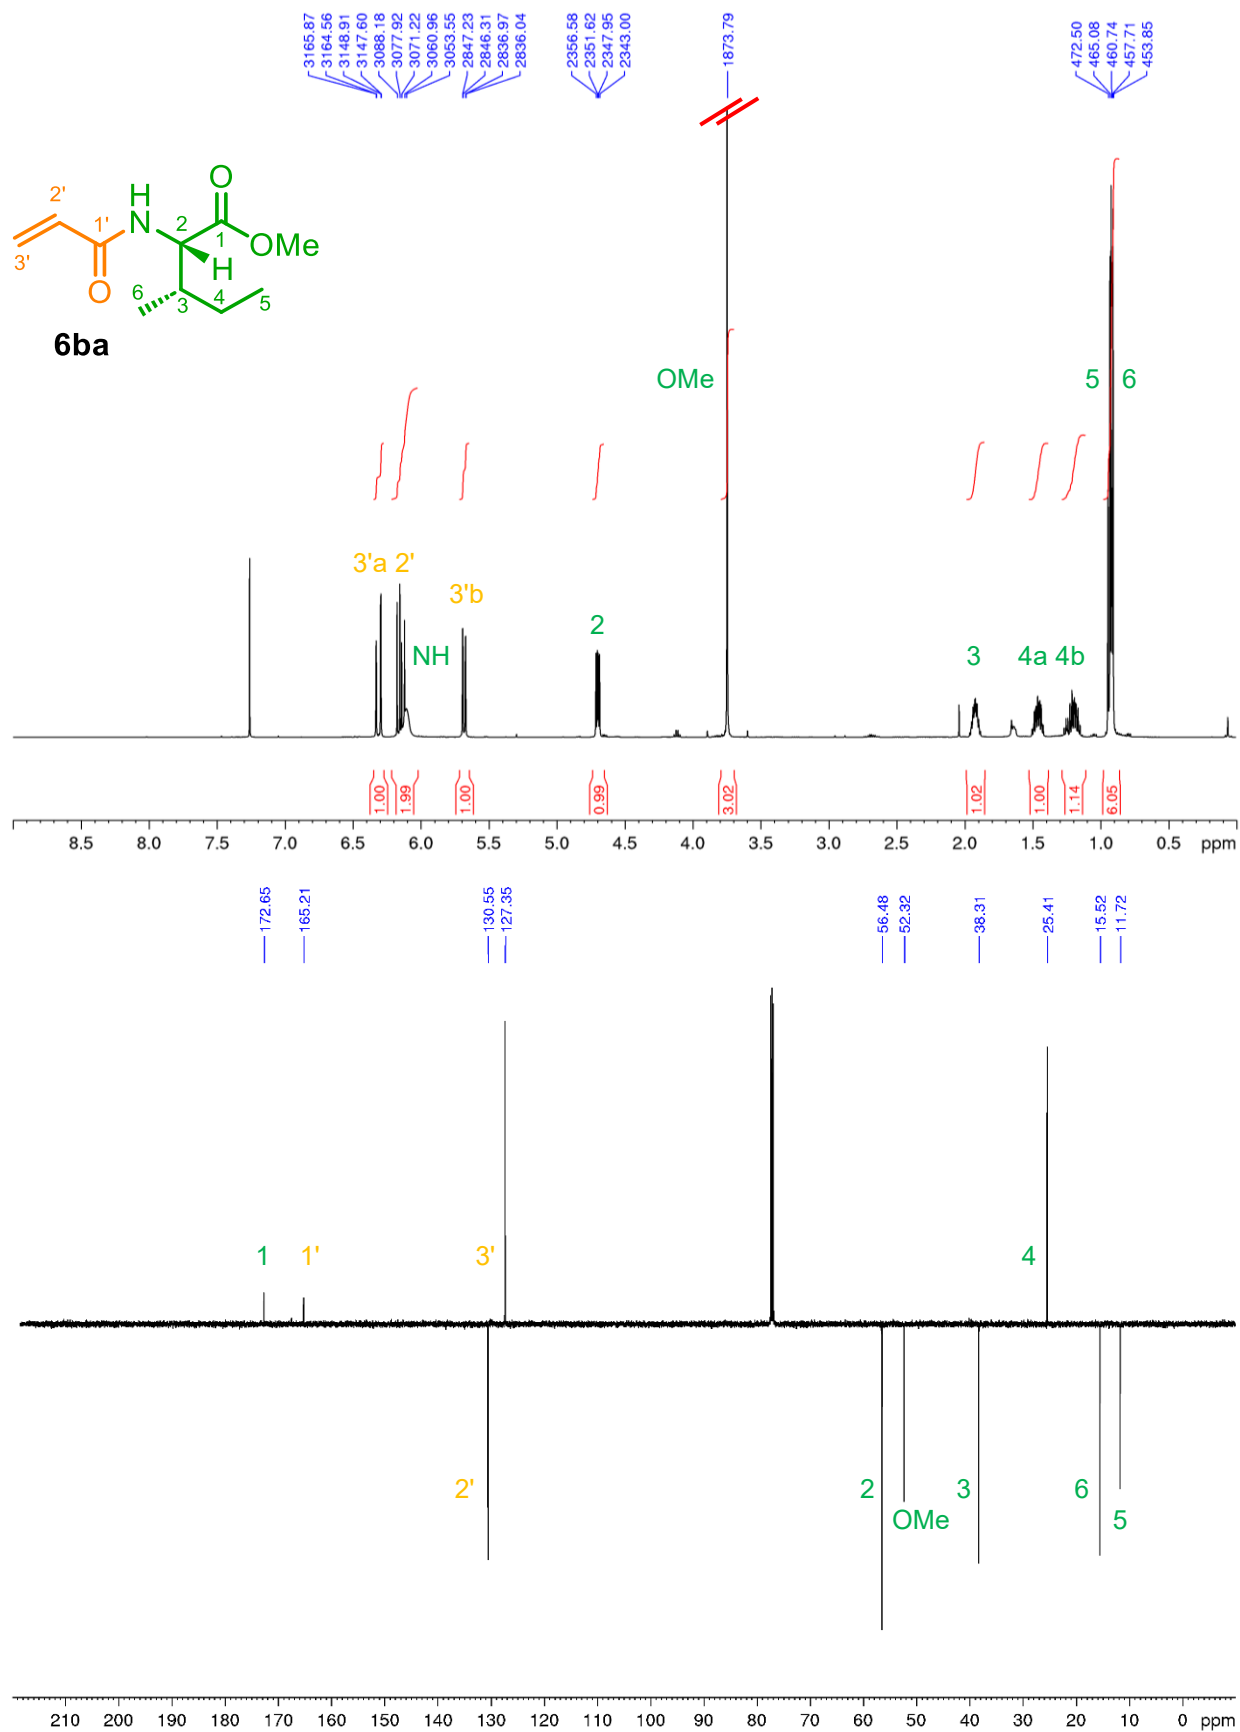

$^1\text{H}$  NMR (500 MHz,  $\text{CDCl}_3$ ) and  $^{13}\text{C}$  Jmod NMR (125 MHz,  $\text{CDCl}_3$ ) of **3aaa**:

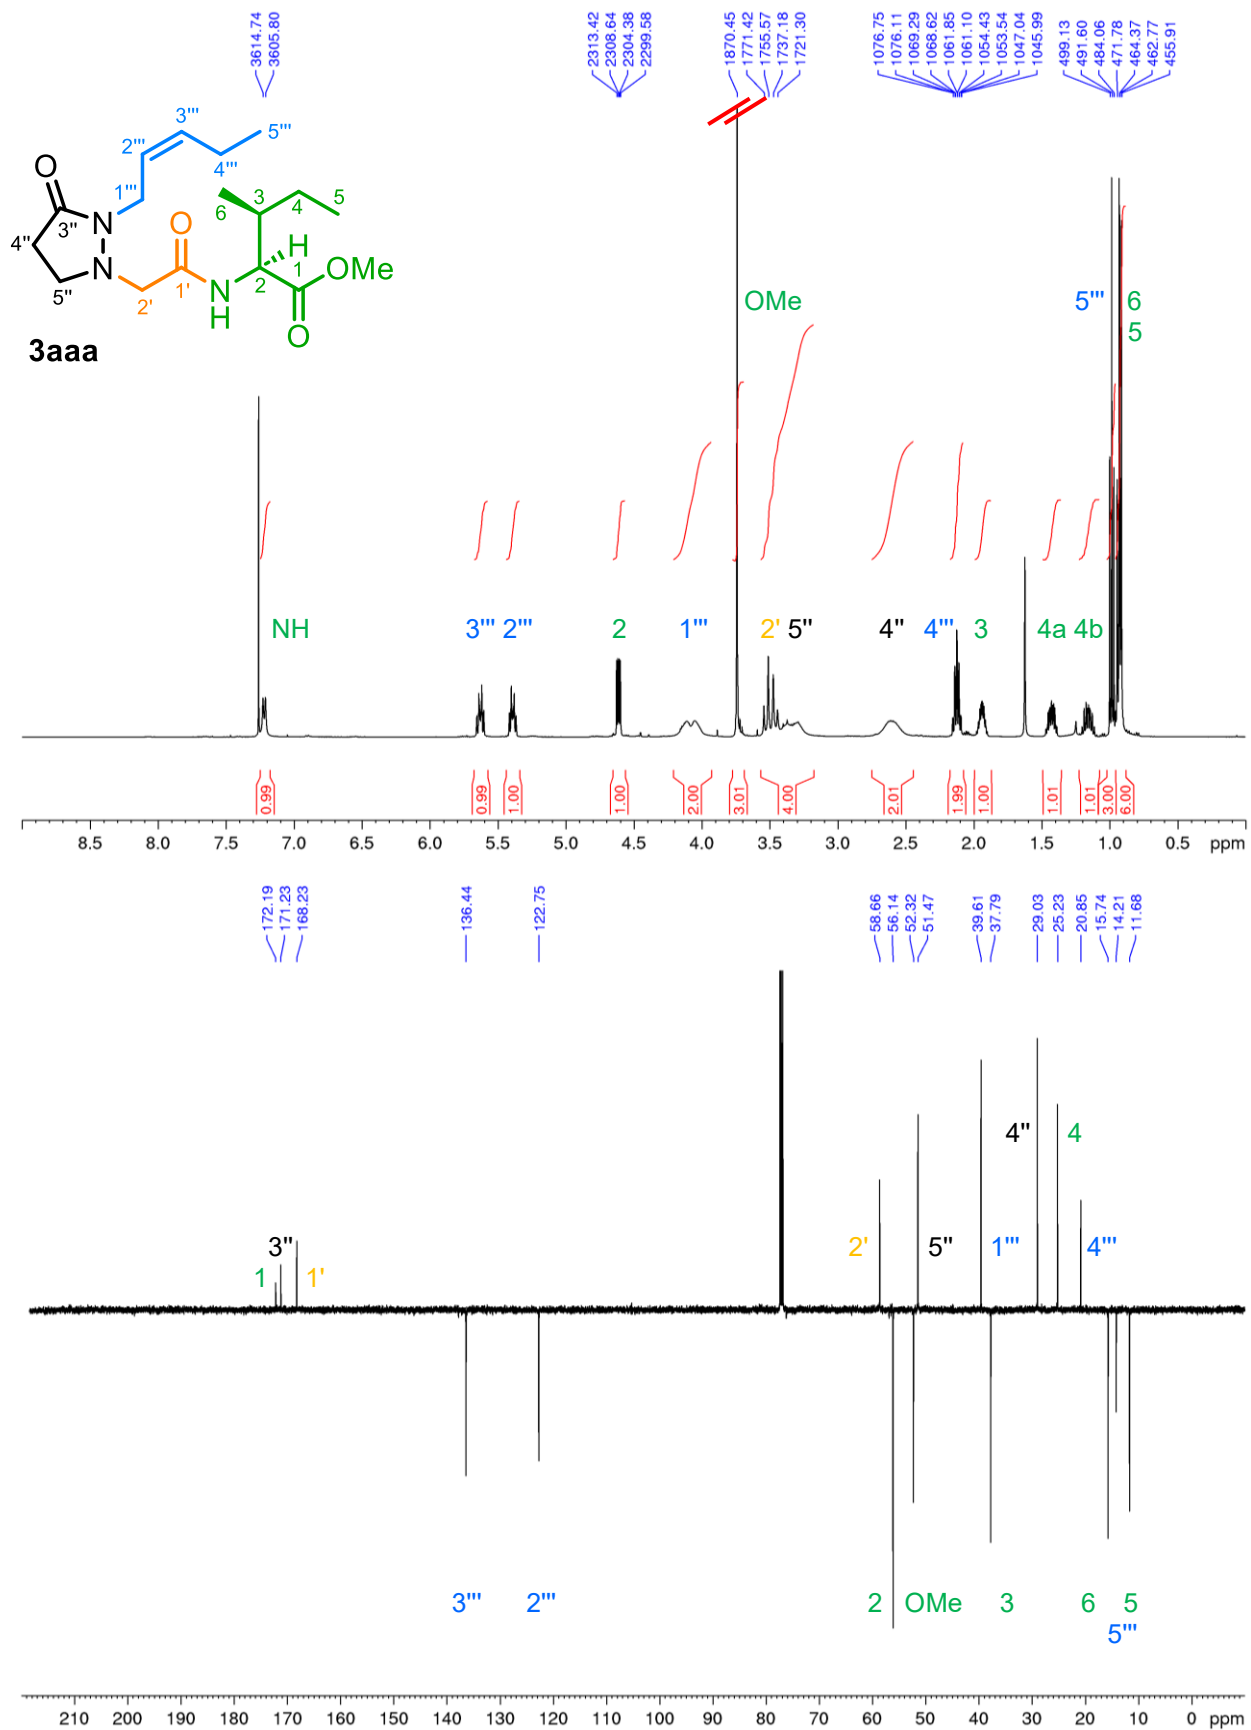

$^1\text{H}$  NMR (500 MHz,  $\text{CDCl}_3$ ) and  $^{13}\text{C}$  Jmod NMR (125 MHz,  $\text{CDCl}_3$ ) of **3aab**:

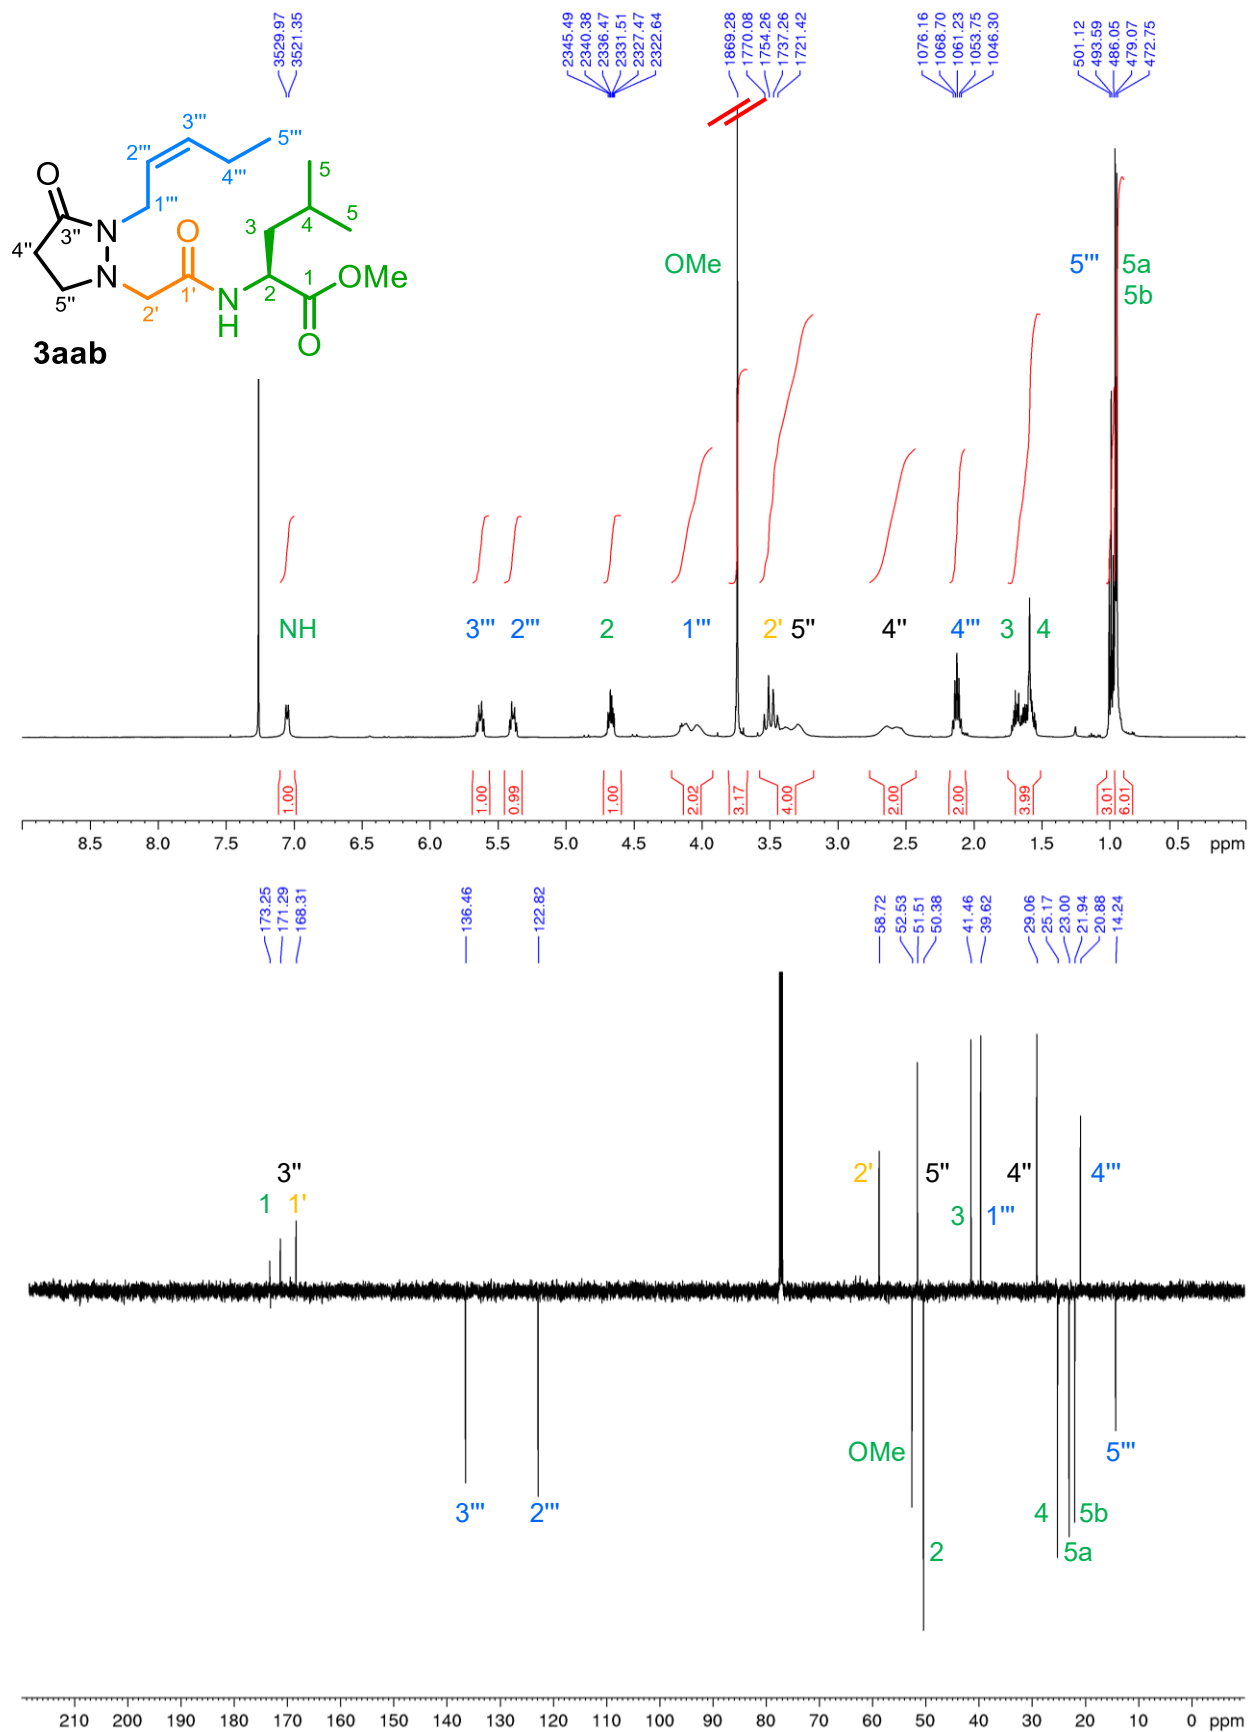

$^1\text{H}$  NMR (500 MHz,  $\text{CDCl}_3$ ) and  $^{13}\text{C}$  Jmod NMR (125 MHz,  $\text{CDCl}_3$ ) of **3aac**:

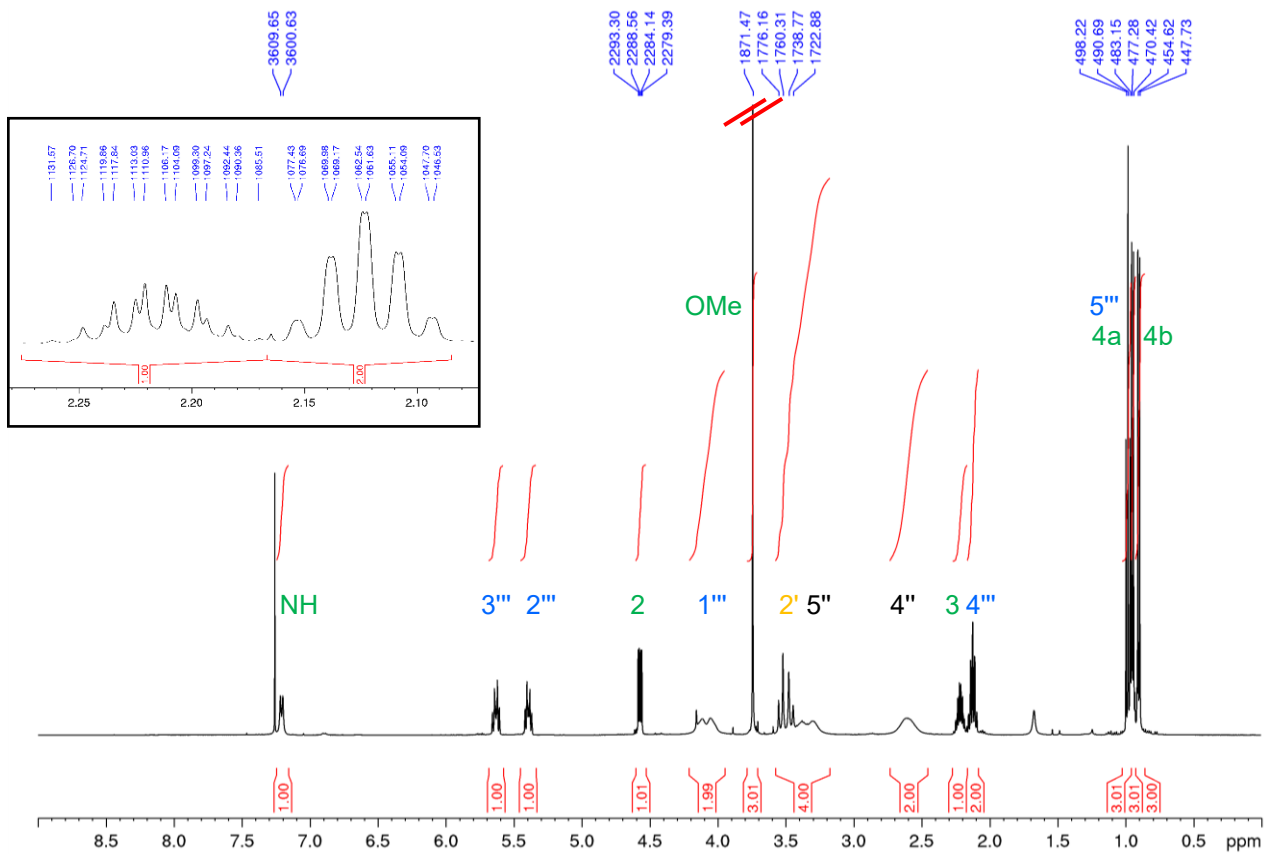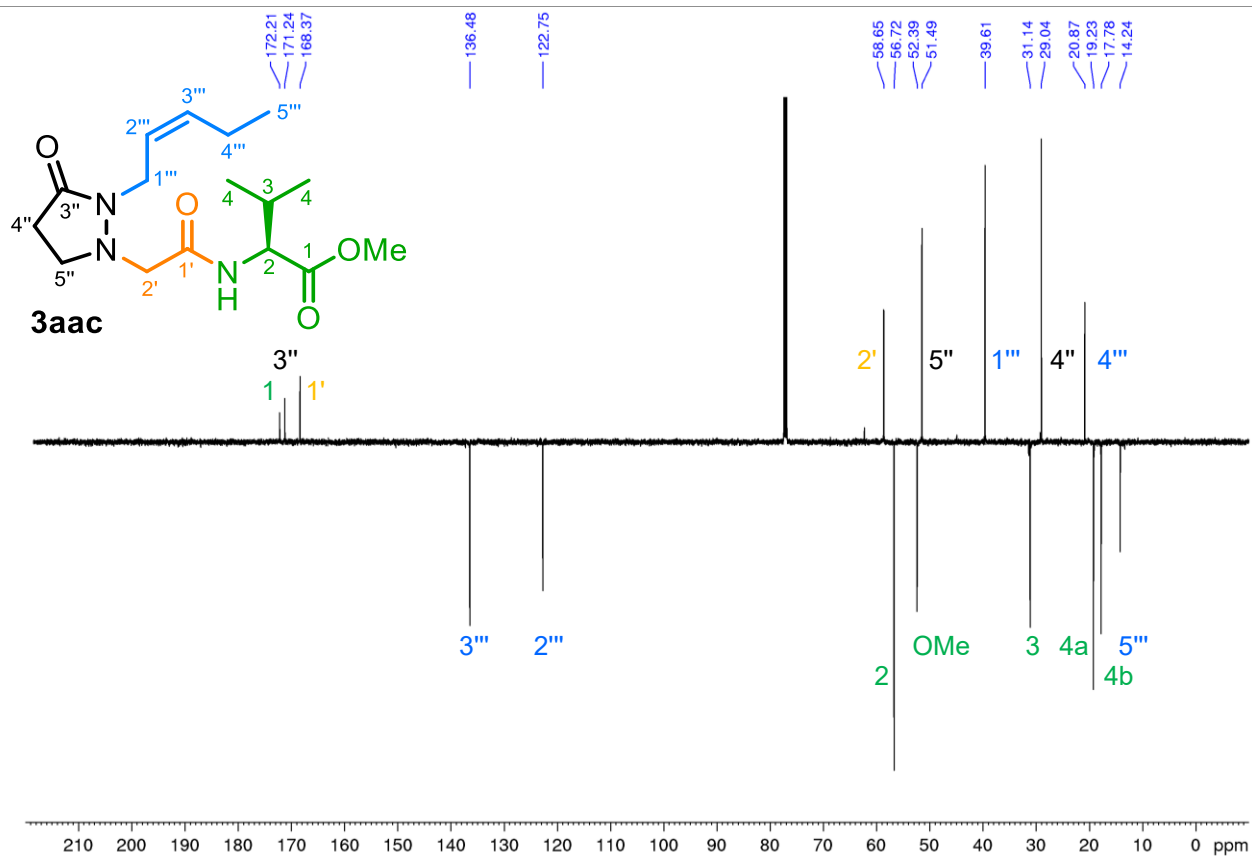

$^1\text{H}$  NMR (300 MHz,  $\text{CDCl}_3$ ) and  $^{13}\text{C}$  Jmod NMR (75 MHz,  $\text{CDCl}_3$ ) of **3aad**:

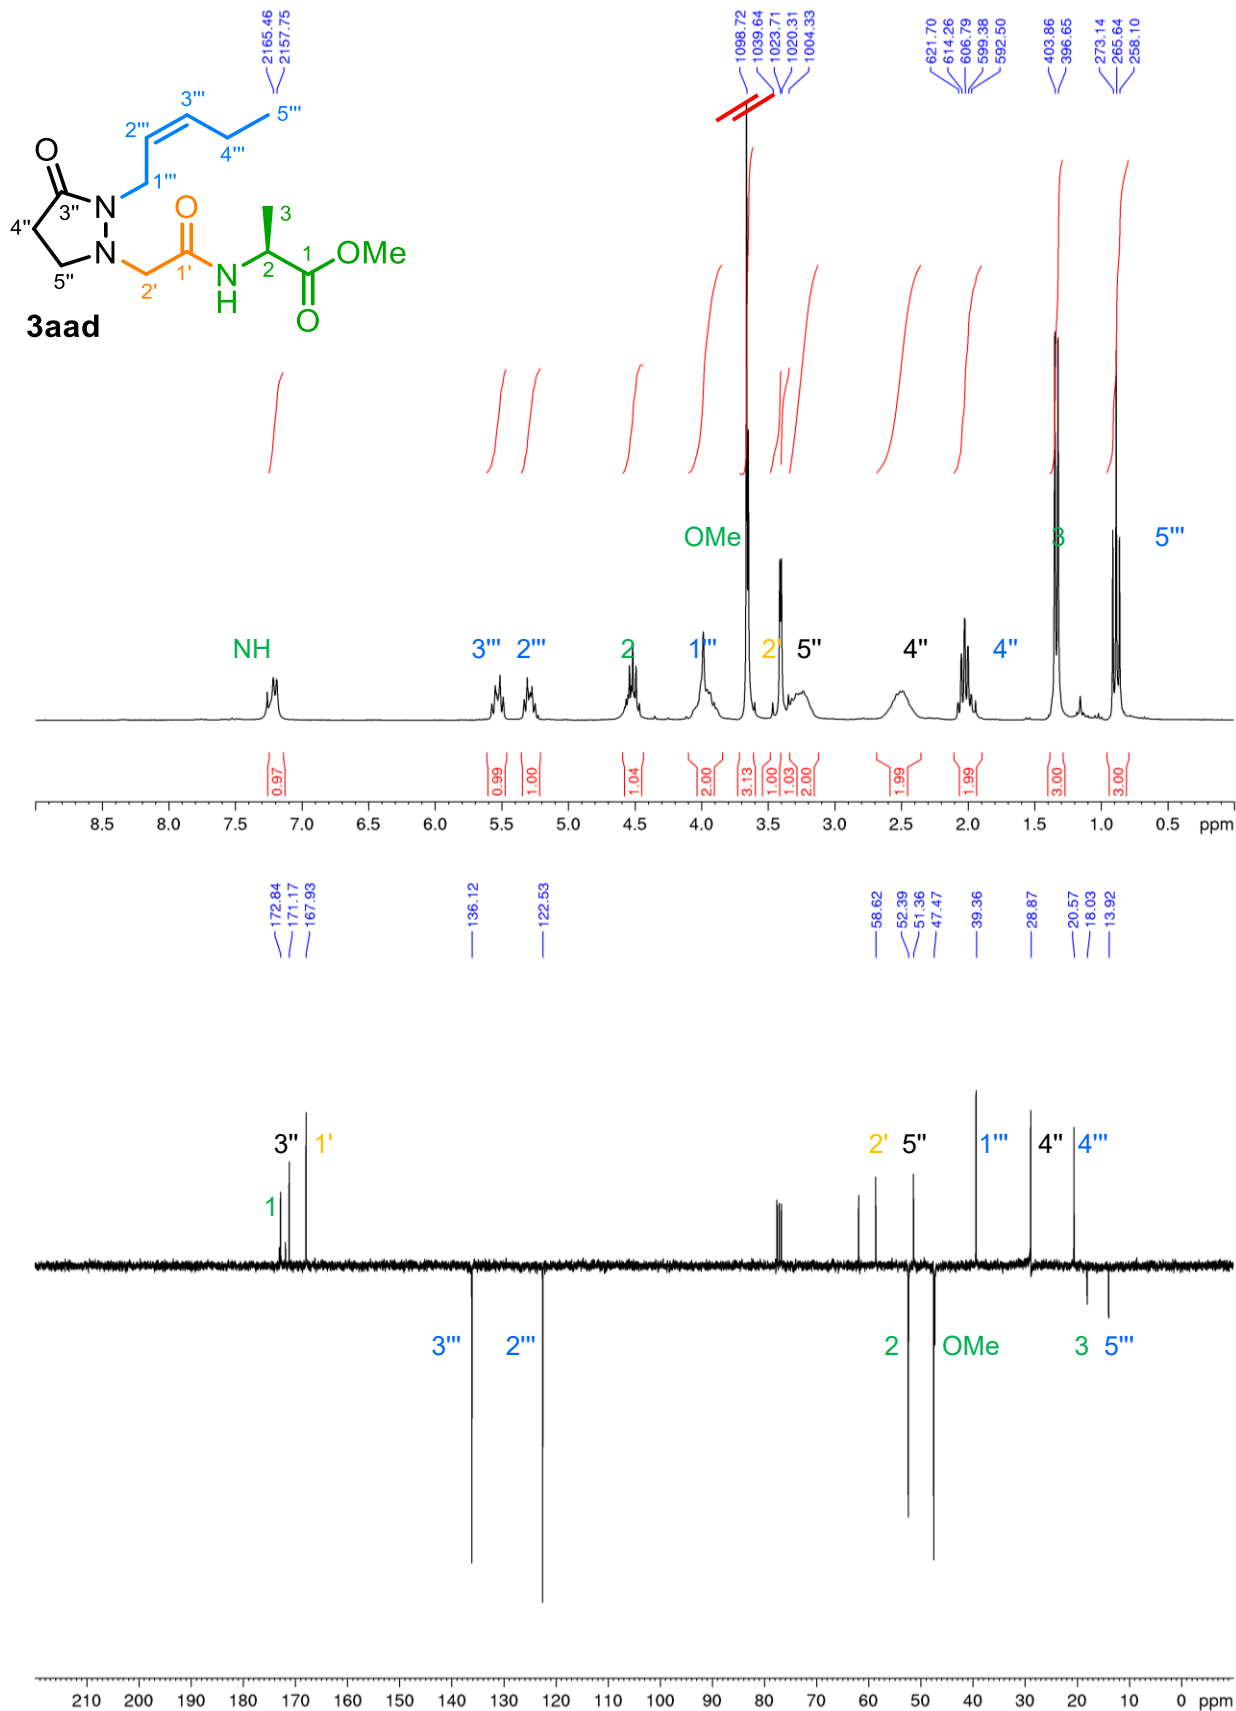

$^1\text{H}$  NMR (300 MHz,  $\text{CDCl}_3$ ) and  $^{13}\text{C}$  Jmod NMR (125 MHz,  $\text{CDCl}_3$ ) of **3aee**:

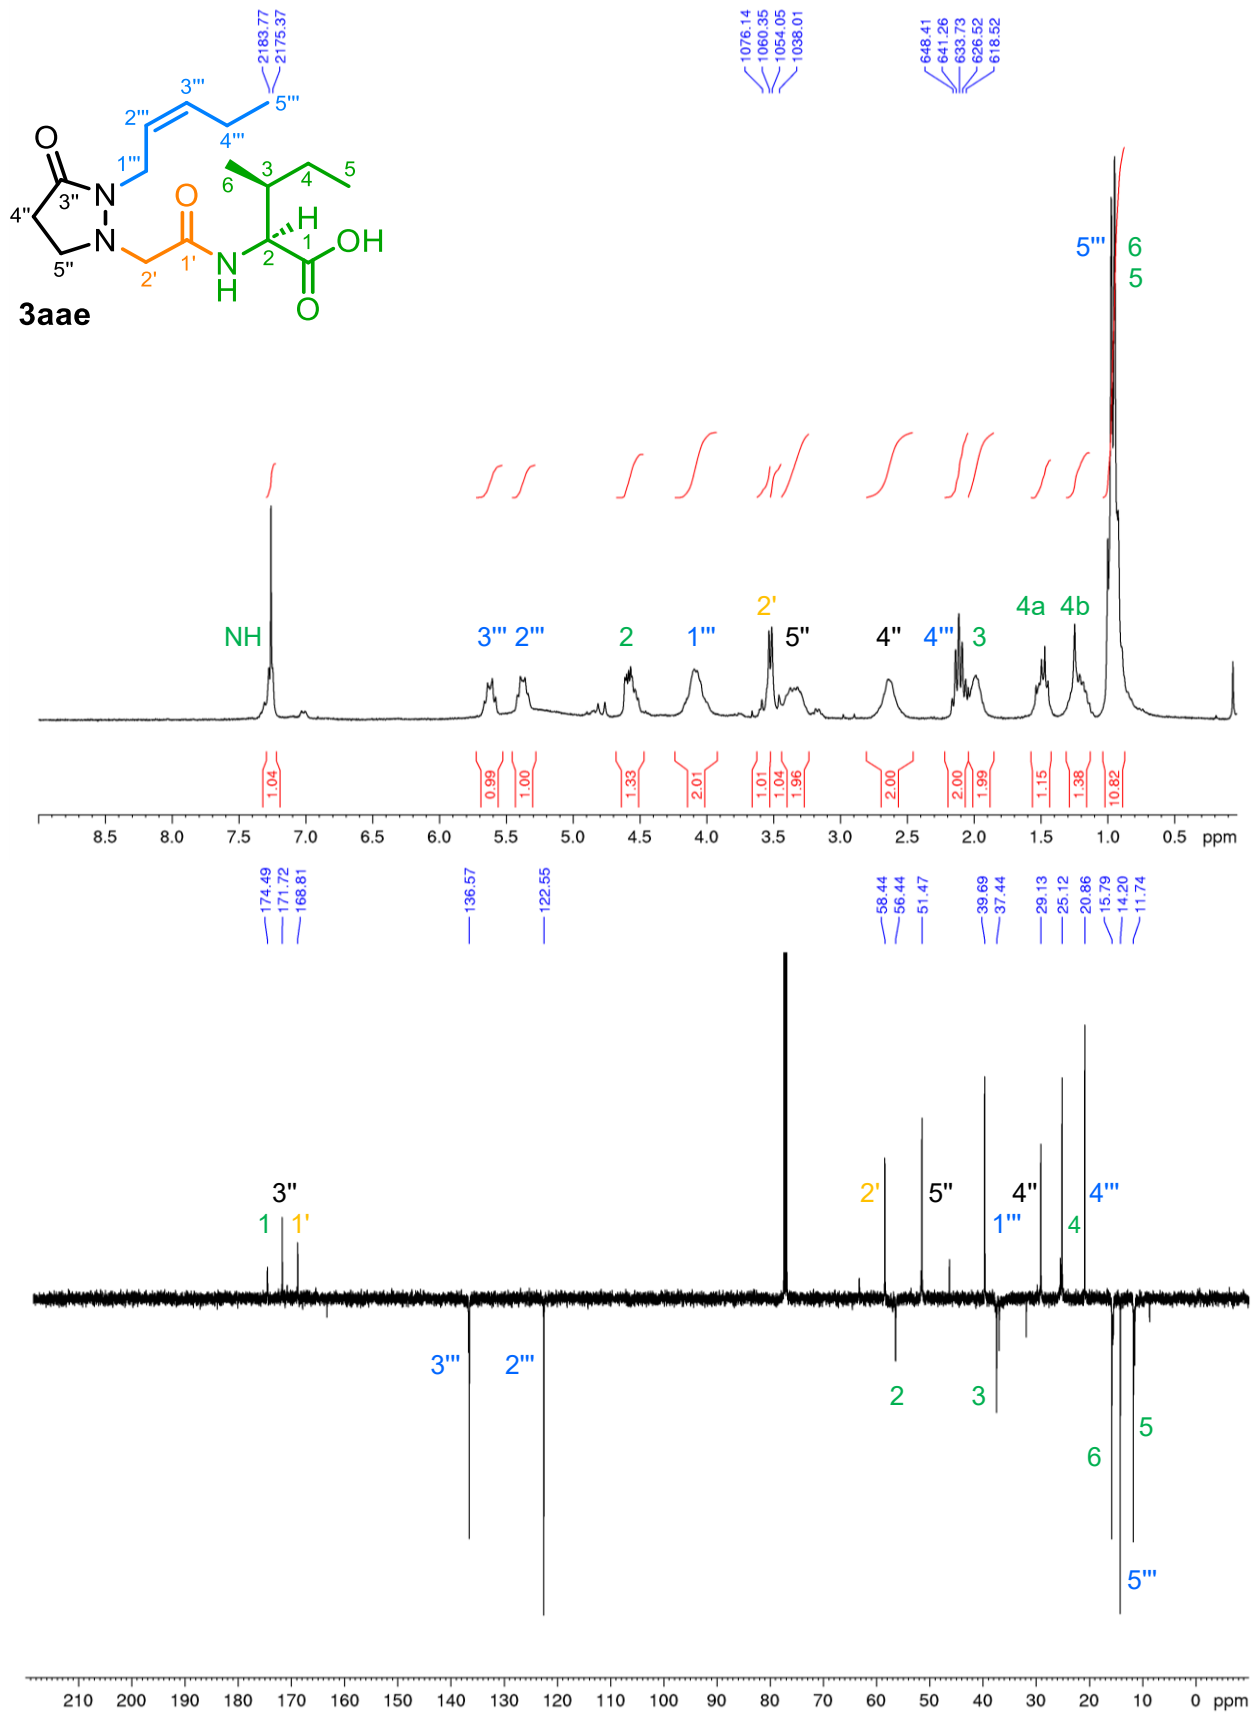



$^1\text{H}$  NMR (500 MHz,  $\text{CDCl}_3$ ) and  $^{13}\text{C}$  Jmod NMR (125 MHz,  $\text{CDCl}_3$ ) of **3caa**:

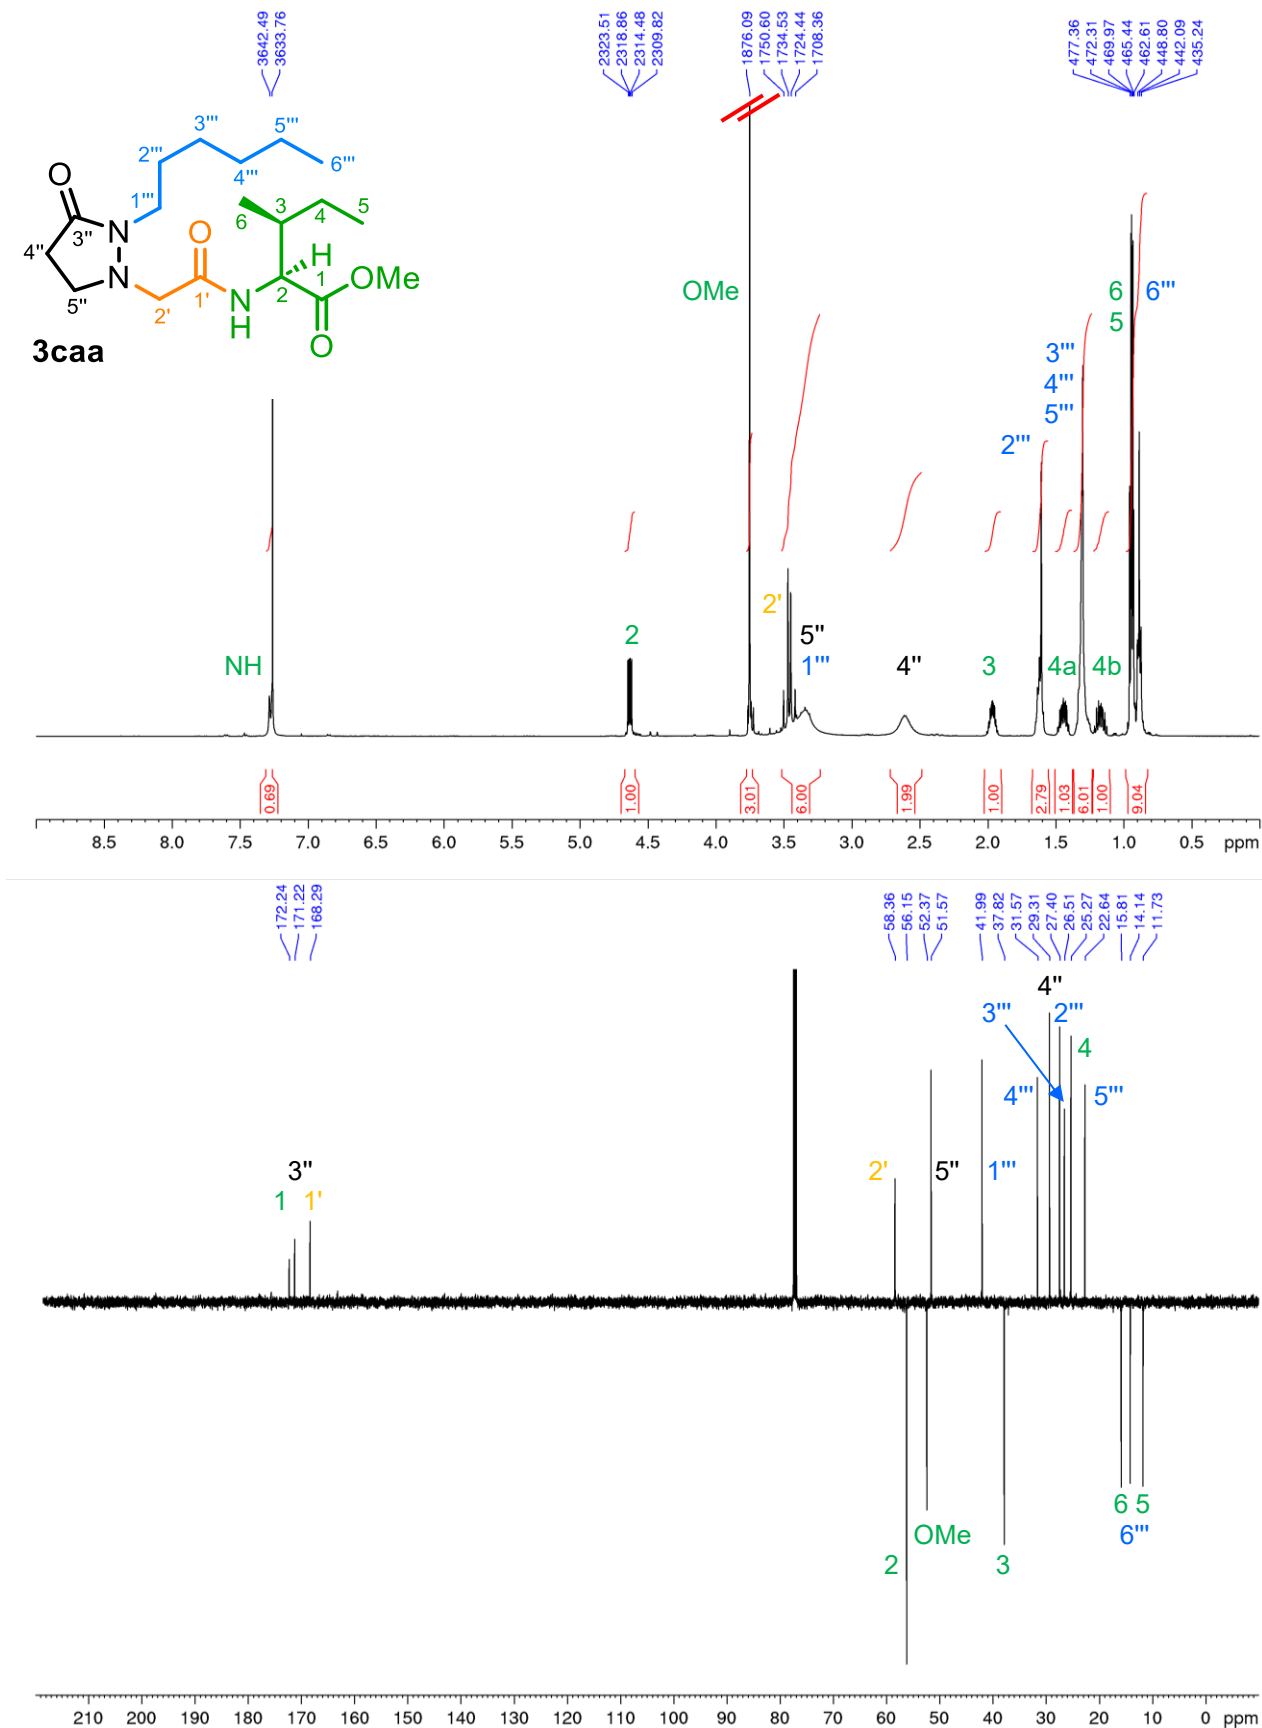



<sup>1</sup>H NMR (500 MHz, CDCl<sub>3</sub>) and <sup>13</sup>C Jmod NMR (125 MHz, CDCl<sub>3</sub>) of **3daa**:

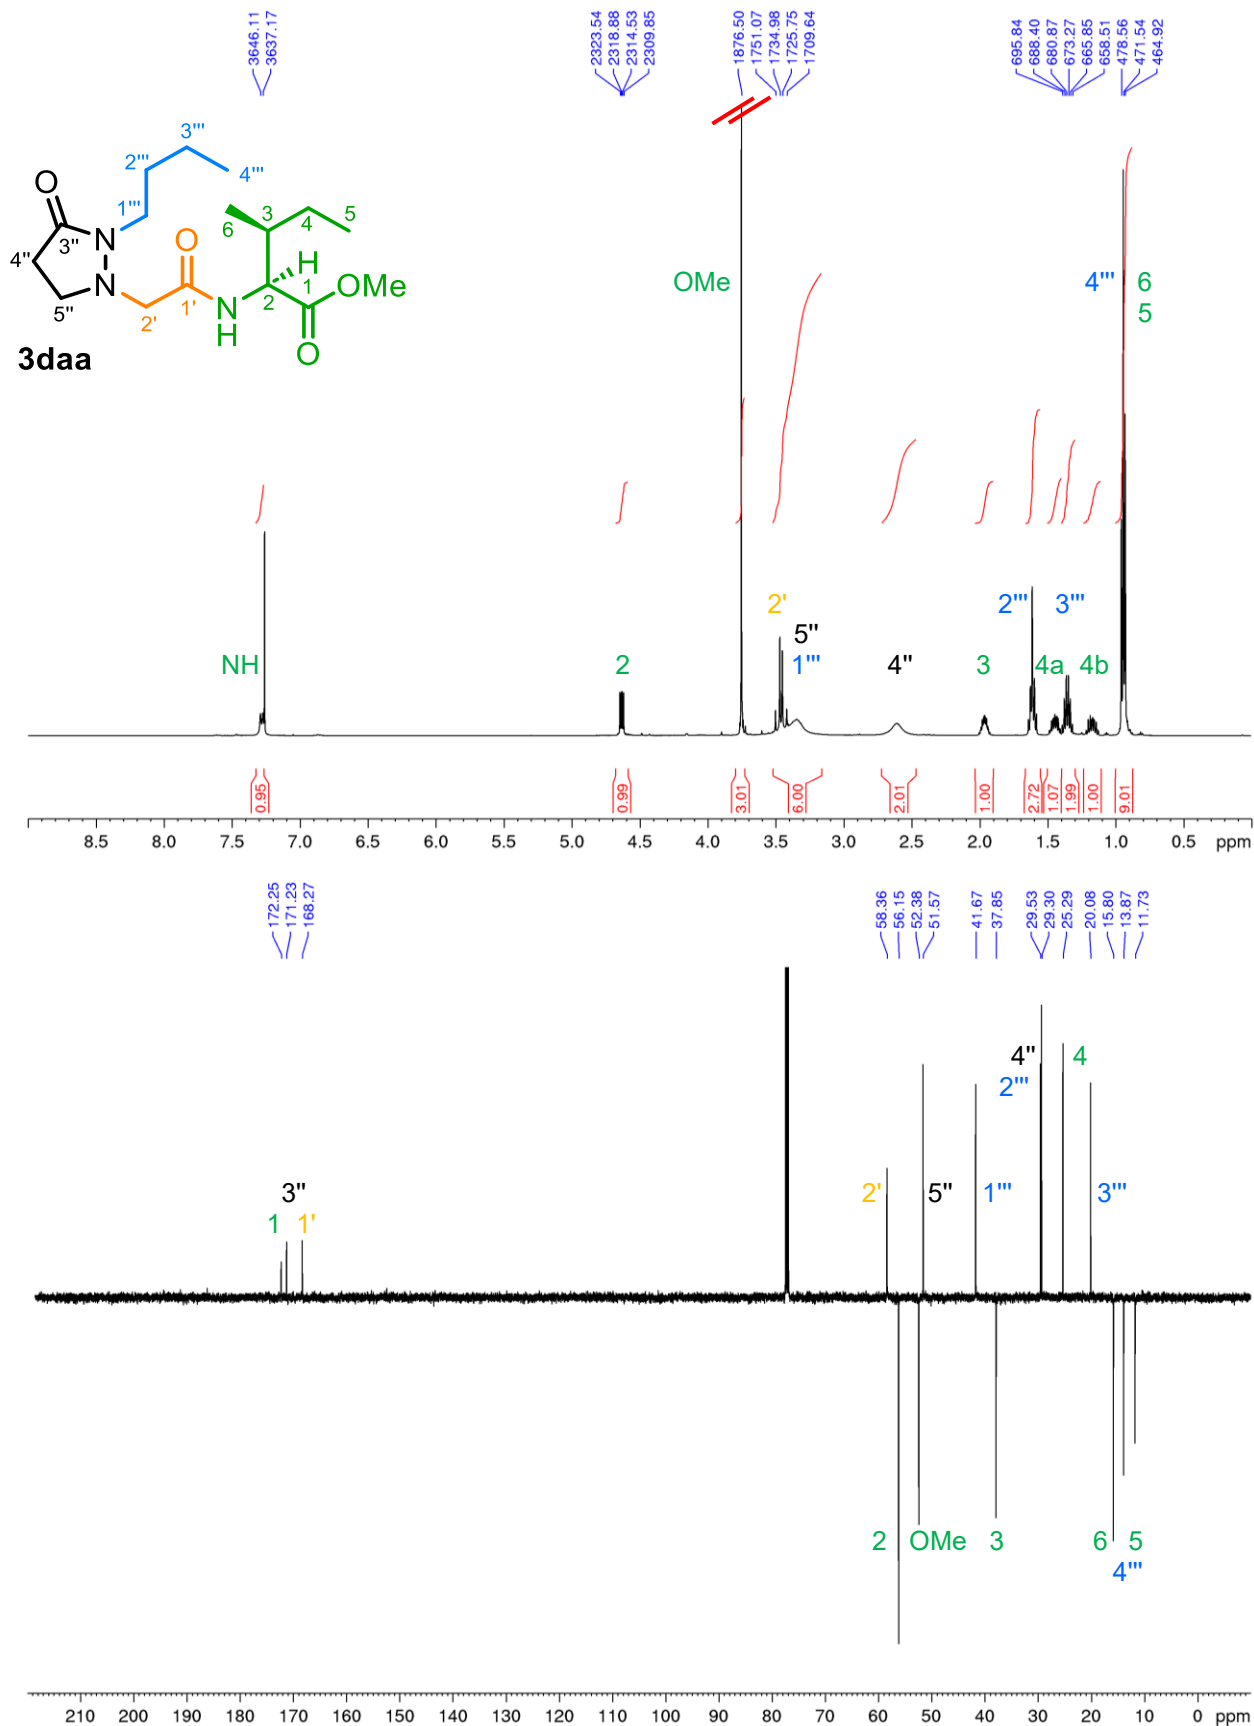

$^1\text{H}$  NMR (500 MHz,  $\text{CDCl}_3$ ) and  $^{13}\text{C}$  Jmod NMR (125 MHz,  $\text{CDCl}_3$ ) of **3aba**:

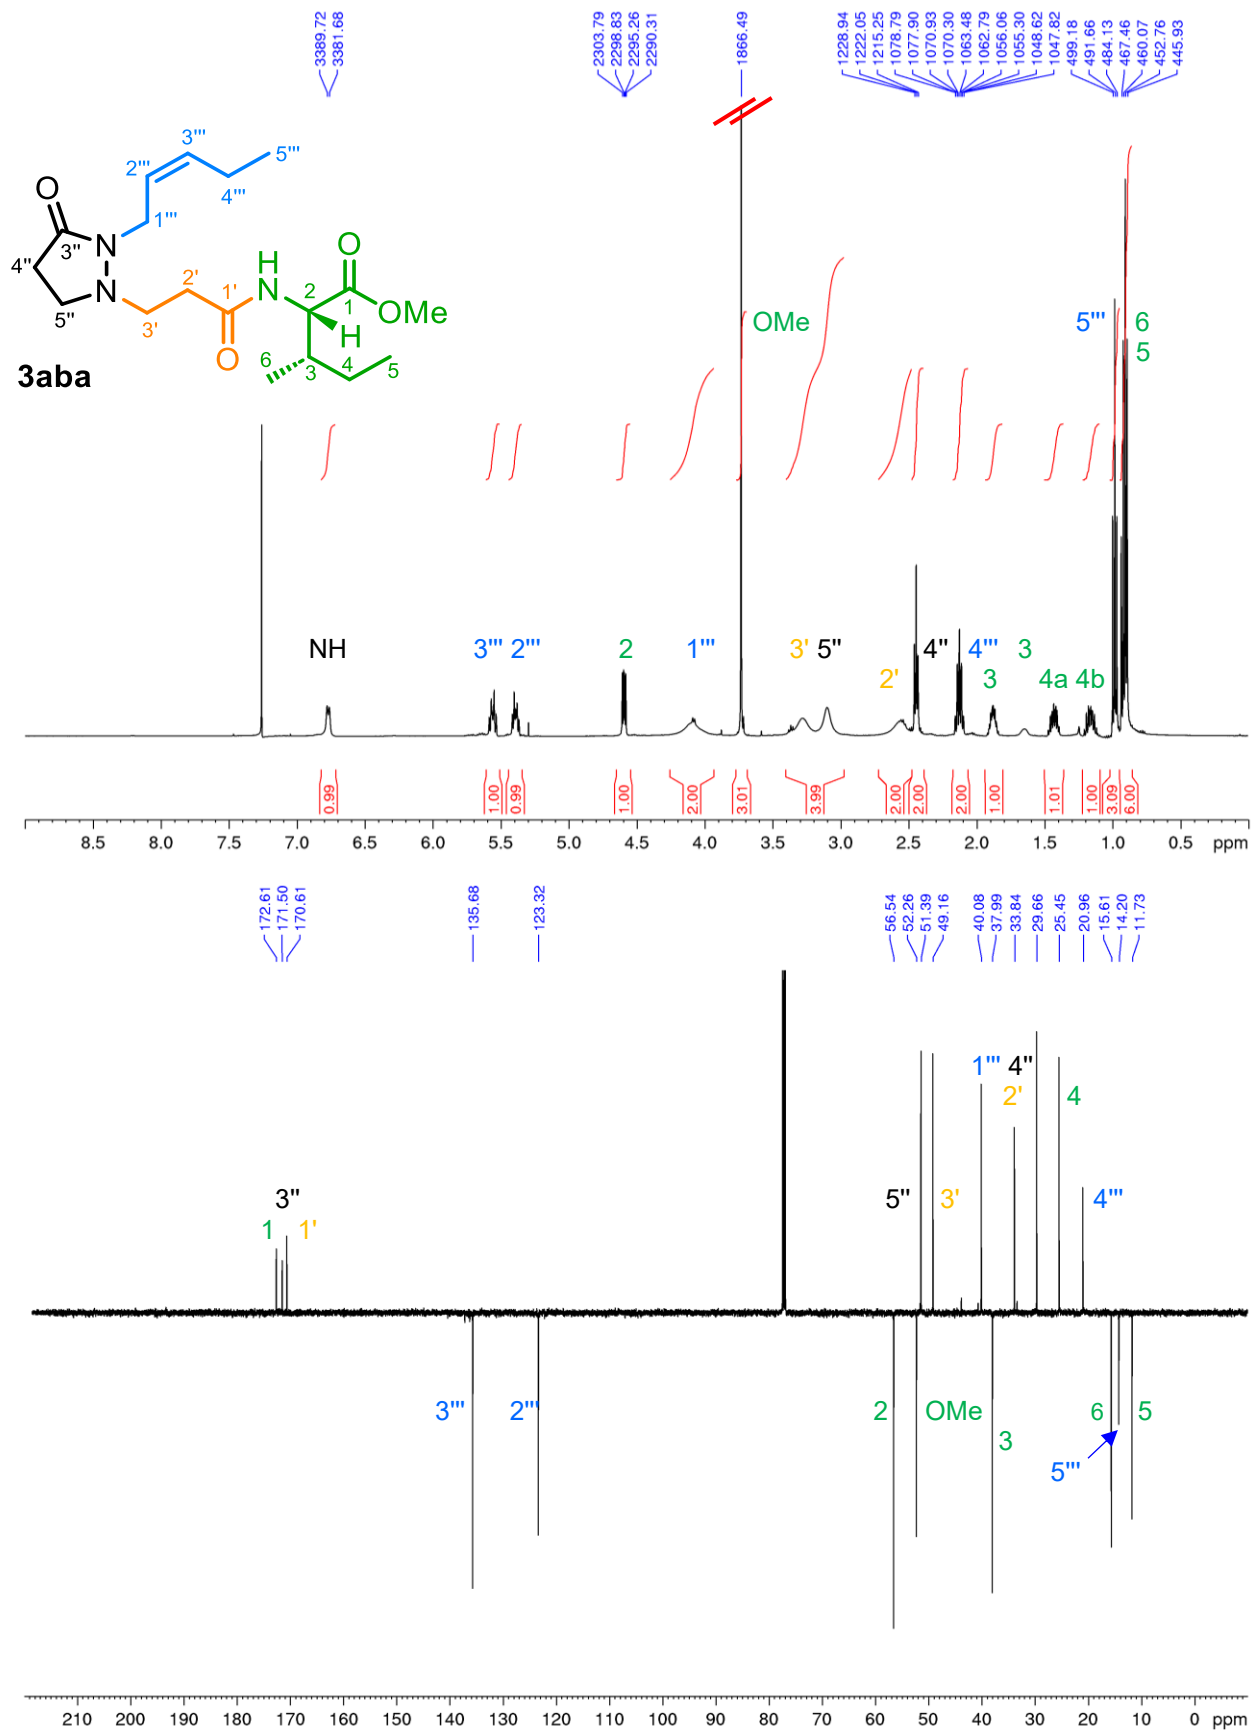

$^1\text{H}$  NMR (500 MHz,  $\text{CDCl}_3$ ) and  $^{13}\text{C}$  Jmod NMR (125 MHz,  $\text{CDCl}_3$ ) of **3bab**:

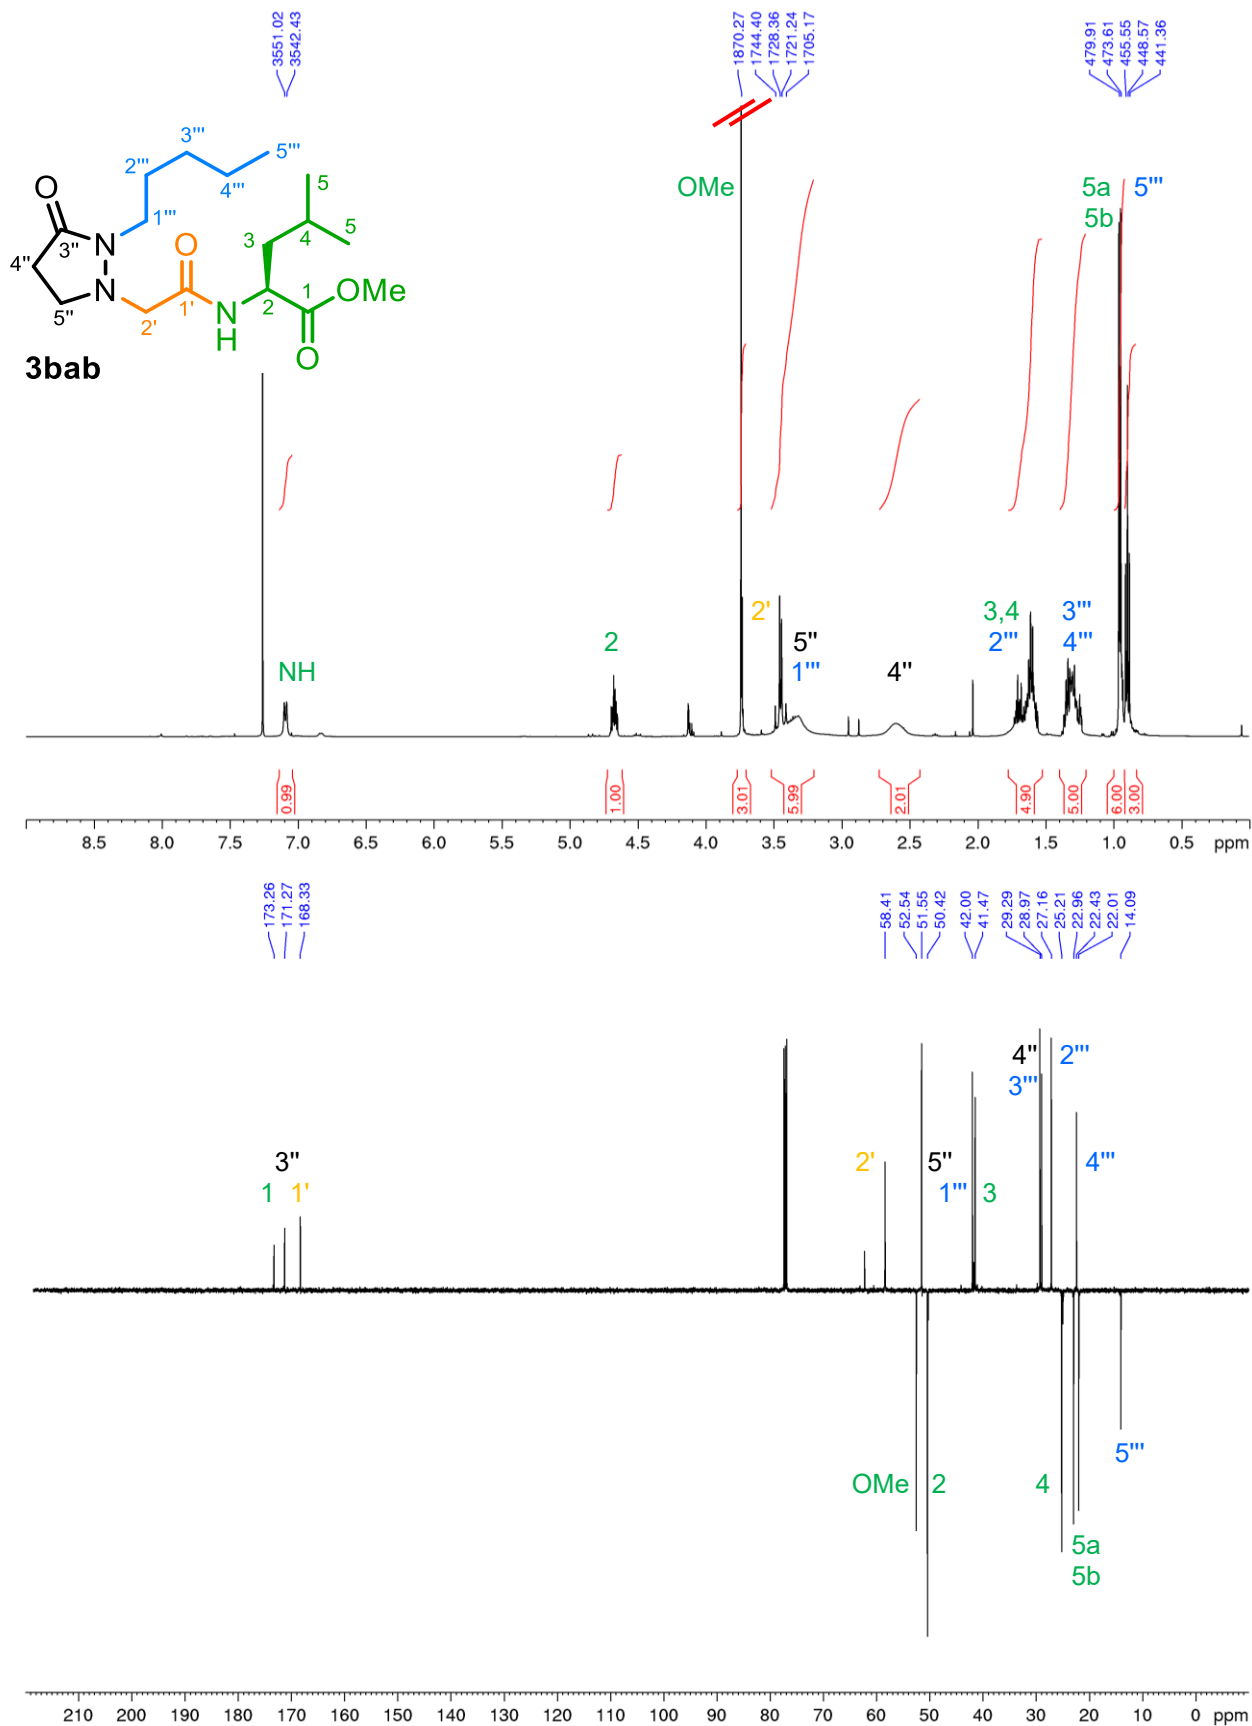

$^1\text{H}$  NMR (300 MHz,  $\text{CDCl}_3$ ) and  $^{13}\text{C}$  Jmod NMR (75 MHz,  $\text{CDCl}_3$ ) of **3bac**:

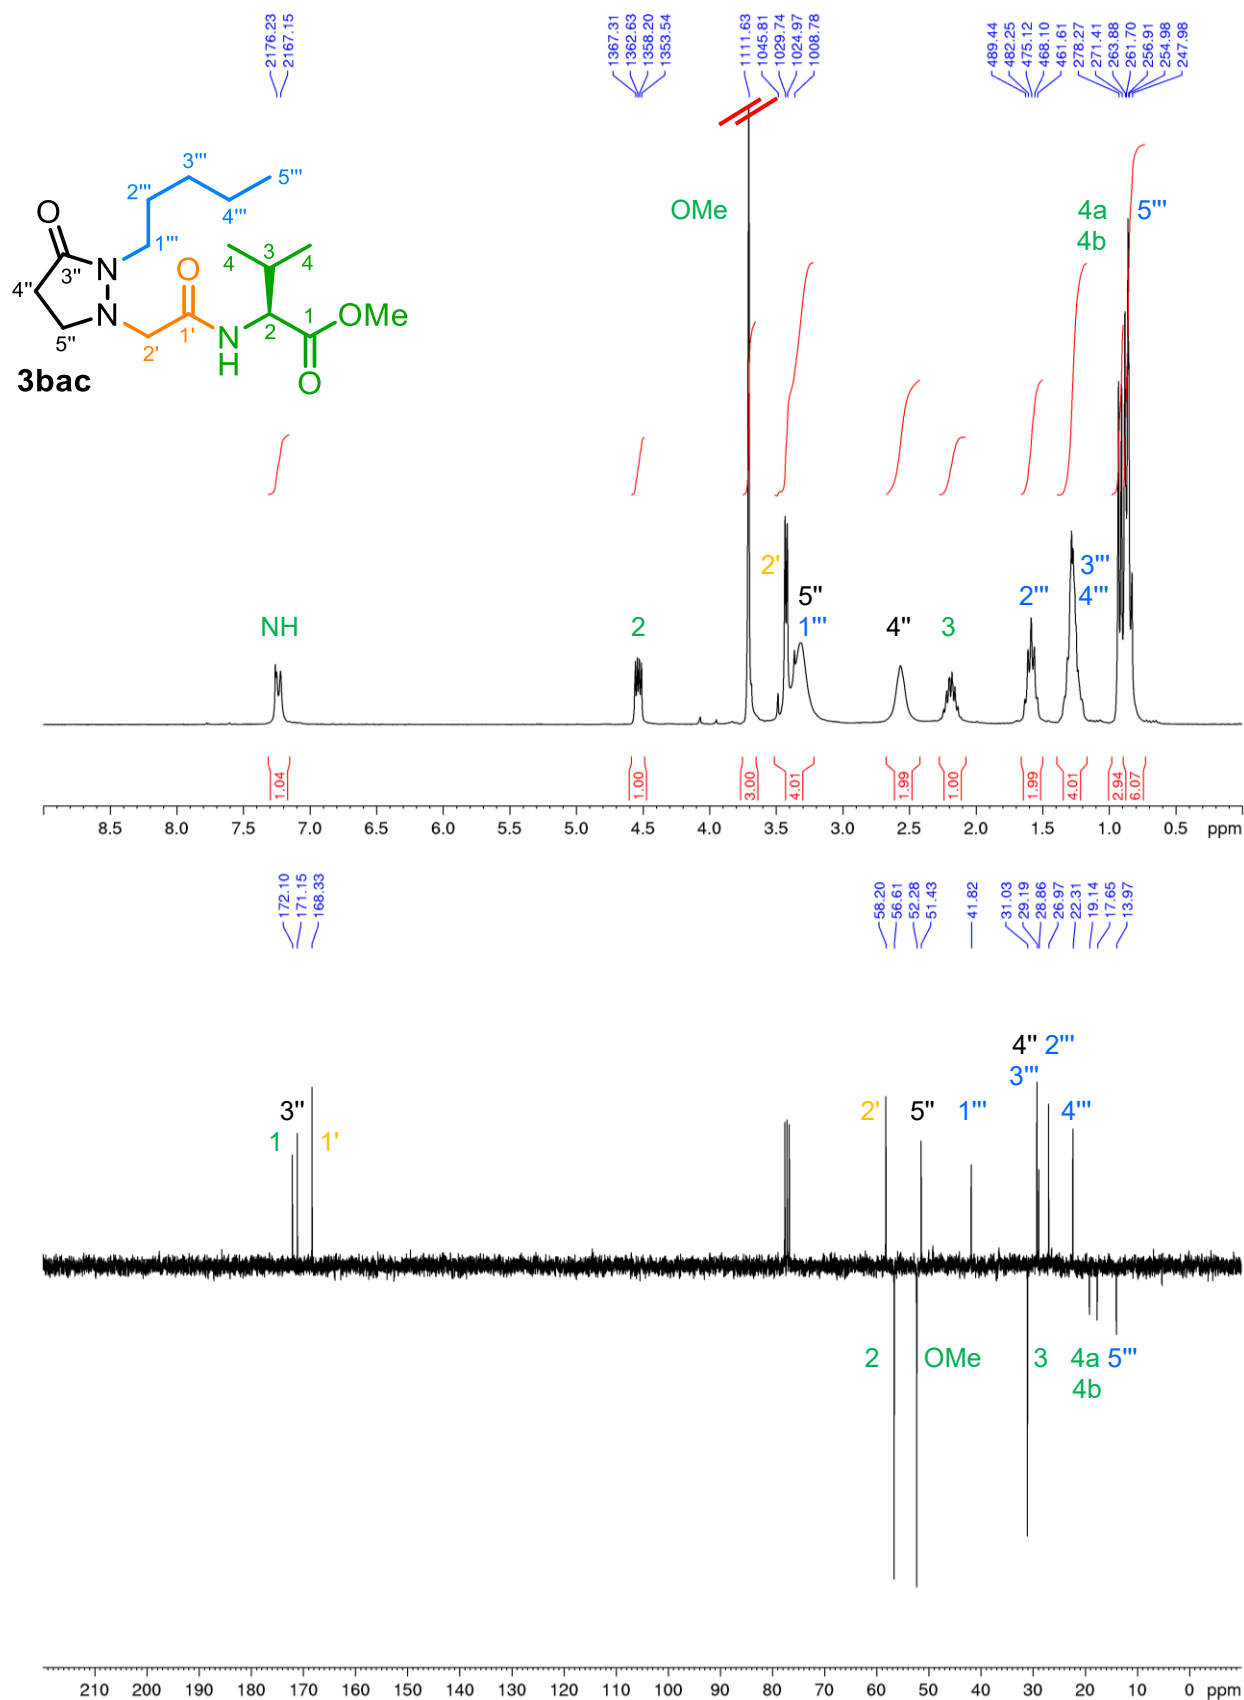

Supplement: d3ra07887f1.pdf [file d3ra07887f1.pdf]
